# Supplementary material for: Gynecologists May Underestimate the Amount of Blood Loss during Total Laparoscopic Hysterectomy
Source: Obstet Gynecol Int. 2018 Dec 16;2018:3802532. doi: 10.1155/2018/3802532 (PMC6311784; doi:10.1155/2018/3802532)
Supplement: Supplementary Materials — Raw data including the amount of bleeding in each operation. [file 3802532.f1.xlsx]

## Sheet: Rawdata
Bleeding (ml)	Hb_pre	Hct_pre	RBC_pre	Hb_post	Hct_post	RBC_post	Abdominal or Laparoscopic surgery	Operation
0	11.4	34.2	355	11.4	34.7	354	Abdominal	Cystectomy or USO
0	15.3	44.9	497	13.7	41.9	459	Abdominal	Cystectomy or USO
5	12.1	36.2	389	12.2	36.2	389	Abdominal	Cystectomy or USO
5	11.9	36.4	408	10.6	32.9	373	Abdominal	Cystectomy or USO
5	13.2	39.7	421	12	35.5	379	Abdominal	Cystectomy or USO
5	12.2	36.6	407	11.4	34.5	384	Abdominal	Cystectomy or USO
5	14	40.5	430	12.8	38.3	400	Abdominal	Cystectomy or USO
6	14	40.6	479	12.1	35.6	422	Abdominal	Cystectomy or USO
6	12.6	37.5	423	12.4	36.3	413	Abdominal	Cystectomy or USO
7	10.8	32.6	367	9.4	29.3	325	Abdominal	Cystectomy or USO
7	14	40.2	458	11.8	35.5	398	Abdominal	Cystectomy or USO
8	13.2	42.3	438	12.2	38.3	398	Abdominal	Cystectomy or USO
10	12.8	38.2	414	11.1	33.8	360	Abdominal	Cystectomy or USO
10	14.2	43.8	473	12.1	37.8	410	Abdominal	Cystectomy or USO
11	13.6	39.9	437	12.3	36.4	403	Abdominal	Cystectomy or USO
12	13	38.6	419	11.5	34.5	371	Abdominal	Cystectomy or USO
12	11.4	34.8	424	11.2	34	409	Abdominal	Cystectomy or USO
12	12.5	37.9	381	10.9	33	334	Abdominal	Cystectomy or USO
14	10.5	34.2	428	9.7	30.7	388	Abdominal	Cystectomy or USO
15	13	39.6	448	11.6	35.6	404	Abdominal	Cystectomy or USO
15	11.3	35.9	499	10.3	33.9	466	Abdominal	Cystectomy or USO
15	11.3	35	473	10.4	33.2	444	Abdominal	Cystectomy or USO
16	13.7	41	480	12.3	36.9	438	Abdominal	Cystectomy or USO
20	11.8	34.3	333	10.3	29.8	290	Abdominal	Cystectomy or USO
20	12	35.8	447	9.8	30.4	372	Abdominal	Cystectomy or USO
21	14.2	41.5	459	13.3	40.3	427	Abdominal	Cystectomy or USO
22	12.9	38.3	419	11.1	34.4	366	Abdominal	Cystectomy or USO
22	12.8	38.6	424	10.2	31.2	337	Abdominal	Cystectomy or USO
29	12.8	38.6	474	11.4	34.8	423	Abdominal	Cystectomy or USO
30	13.6	40.5	475	13.4	39.7	468	Abdominal	Cystectomy or USO
30	10.2	31.2	394	9.2	28.9	362	Abdominal	Cystectomy or USO
33	12.8	39.7	436	12.4	37.8	421	Abdominal	Cystectomy or USO
35	10.8	34.1	367	9.9	31.4	339	Abdominal	Cystectomy or USO
35	14.3	42	469	11.9	34.8	390	Abdominal	Cystectomy or USO
35	12.5	38.2	413	11.3	35.5	377	Abdominal	Cystectomy or USO
37	13.5	40.5	456	12.6	37.2	421	Abdominal	Cystectomy or USO
40	9	27.2	306	8.3	25.8	286	Abdominal	Cystectomy or USO
40	12.5	38.7	464	12.2	37.5	447	Abdominal	Cystectomy or USO
41	13.7	40.7	423	12.4	37.7	386	Abdominal	Cystectomy or USO
44	12.5	38.1	409	12.1	36.8	397	Abdominal	Cystectomy or USO
48	12.1	36.3	409	11.2	33.4	384	Abdominal	Cystectomy or USO
49	13.7	42.4	441	12.2	38.9	402	Abdominal	Cystectomy or USO
50	13.7	42	452	12.1	37.6	402	Abdominal	Cystectomy or USO
52	13.7	41.7	423	13.1	38.9	390	Abdominal	Cystectomy or USO
54	13.5	39.5	451	12.6	37.4	424	Abdominal	Cystectomy or USO
59	12.3	37.2	431	11.6	34.4	398	Abdominal	Cystectomy or USO
60	10.8	31.6	351	10.5	30.9	343	Abdominal	Cystectomy or USO
60	12.2	35.8	388	11.2	33.2	354	Abdominal	Cystectomy or USO
65	12.7	39.3	417	11.5	35.4	378	Abdominal	Cystectomy or USO
68	13.5	40.3	433	12.4	37.4	400	Abdominal	Cystectomy or USO
70	13.7	40.8	465	12.1	36.4	412	Abdominal	Cystectomy or USO
70	9.7	31.2	389	9.5	30.6	379	Abdominal	Cystectomy or USO
75	11.5	35.2	396	10.4	31.8	358	Abdominal	Cystectomy or USO
77	12.1	37.2	423	12.3	37.3	422	Abdominal	Cystectomy or USO
77	12.7	39.1	435	10.9	34.7	379	Abdominal	Cystectomy or USO
81	14.6	42.9	473	14.1	41.8	454	Abdominal	Cystectomy or USO
84	12.7	38.3	438	11.9	36	412	Abdominal	Cystectomy or USO
88	10.5	34.5	474	9.4	30.5	419	Abdominal	Cystectomy or USO
90	10.9	33.8	423	10.4	32.2	409	Abdominal	Cystectomy or USO
91	13.3	38.2	451	11.6	33.3	391	Abdominal	Cystectomy or USO
93	12.8	38.8	440	11.5	34.9	393	Abdominal	Cystectomy or USO
100	10.6	31.3	366	9.2	26.7	315	Abdominal	Cystectomy or USO
108	13.9	40.6	467	12.5	36.8	420	Abdominal	Cystectomy or USO
108	13.5	40	463	12.6	37.4	423	Abdominal	Cystectomy or USO
116	10.4	33.9	417	10.4	32.5	405	Abdominal	Cystectomy or USO
116	12.6	37.9	415	11.9	35.9	397	Abdominal	Cystectomy or USO
119	15	44.4	508	12.9	38.6	442	Abdominal	Cystectomy or USO
148	12.9	39.5	459	10.3	31.1	361	Abdominal	Cystectomy or USO
164	13.2	38.9	423	11.9	35.5	381	Abdominal	Cystectomy or USO
165	13.8	40.8	453	11.5	34.1	378	Abdominal	Cystectomy or USO
185	12.3	37	403	11.6	34.5	373	Abdominal	Cystectomy or USO
186	12.7	37.1	391	12.4	36.7	379	Abdominal	Cystectomy or USO
188	12.2	37.4	424	11.9	36.8	413	Abdominal	Cystectomy or USO
192	14.7	42.2	463	12.8	38.5	415	Abdominal	Cystectomy or USO
198	14	43.1	502	12.1	37.2	435	Abdominal	Cystectomy or USO
211	8.6	28.6	369	7.7	25.9	329	Abdominal	Cystectomy or USO
213	12.2	36.2	416	11.6	33.8	387	Abdominal	Cystectomy or USO
226	12.6	38.3	398	10.4	31.6	325	Abdominal	Cystectomy or USO
255	12.6	37.2	427	10.6	32	360	Abdominal	Cystectomy or USO
258	13.7	39.4	456	10.5	30.9	352	Abdominal	Cystectomy or USO
292	13.9	41.3	471	12.8	38.5	441	Abdominal	Cystectomy or USO
350	13.6	41.4	477	11.1	33.4	384	Abdominal	Cystectomy or USO
433	12.6	39.1	422	9.8	30.9	329	Abdominal	Cystectomy or USO
512	13.4	39.5	436	11.4	33.9	371	Abdominal	Cystectomy or USO
538	13.8	41	453	11.7	35.4	391	Abdominal	Cystectomy or USO
603	10	30.8	343	9	26.6	303	Abdominal	Cystectomy or USO
740	10.8	32.8	353	9.6	29.3	312	Abdominal	Cystectomy or USO
874	11.9	36.7	427	9.2	28.4	330	Abdominal	Cystectomy or USO
974	11.2	34.8	426	10.7	33.5	409	Abdominal	Cystectomy or USO
994	10.4	32.6	404	7.5	23.6	299	Abdominal	Cystectomy or USO
7	11.8	37.8	472	9.7	31.6	388	Abdominal	Hysterectomy
10	12.9	38.7	426	12.8	37.8	417	Abdominal	Hysterectomy
13	10.3	31.1	320	9.1	27.6	284	Abdominal	Hysterectomy
15	12.8	38	376	12.3	38	368	Abdominal	Hysterectomy
16	10.9	36	463	9.8	32.2	415	Abdominal	Hysterectomy
25	14.6	44.9	472	12.2	37	391	Abdominal	Hysterectomy
25	11.9	35.9	398	11	32.2	356	Abdominal	Hysterectomy
27	13.4	38.7	442	11.2	33.4	370	Abdominal	Hysterectomy
31	13.3	38.3	443	12.8	37.3	432	Abdominal	Hysterectomy
34	14.3	45	488	11.3	36	387	Abdominal	Hysterectomy
35	11.6	36.1	481	9.1	29	386	Abdominal	Hysterectomy
36	14.8	43.3	485	12.3	36.4	411	Abdominal	Hysterectomy
36	9.8	30.8	422	8.9	28.5	387	Abdominal	Hysterectomy
39	13.6	41.4	476	11.9	35.9	415	Abdominal	Hysterectomy
42	8.9	29.7	263	9	29.9	266	Abdominal	Hysterectomy
43	12.9	37.6	404	11.4	33.5	355	Abdominal	Hysterectomy
45	12	36.5	423	11.5	35.6	409	Abdominal	Hysterectomy
48	11.2	34.1	371	9.4	28.7	314	Abdominal	Hysterectomy
48	15.3	44.8	502	13.9	41.6	465	Abdominal	Hysterectomy
50	12.8	38.3	418	10.9	33.8	366	Abdominal	Hysterectomy
51	12.2	36.1	394	9.9	29.9	325	Abdominal	Hysterectomy
52	12.8	37	428	11.7	34.2	397	Abdominal	Hysterectomy
54	14.7	44.8	494	14.8	45.9	502	Abdominal	Hysterectomy
54	12.9	38.8	448	12.1	36.9	424	Abdominal	Hysterectomy
54	11.1	33	365	9.1	27	298	Abdominal	Hysterectomy
54	13.2	39.8	442	12	37.4	406	Abdominal	Hysterectomy
55	14.2	42.4	478	13	38.8	437	Abdominal	Hysterectomy
56	12.4	37.9	375	11	33.5	329	Abdominal	Hysterectomy
56	14.9	44.9	471	12.8	37.7	398	Abdominal	Hysterectomy
57	13.6	42.5	485	12.3	38.3	436	Abdominal	Hysterectomy
58	13.8	39.6	461	11.3	33.5	389	Abdominal	Hysterectomy
60	13.6	41.9	464	12	36.9	407	Abdominal	Hysterectomy
60	10.3	32.2	303	9.3	28.6	267	Abdominal	Hysterectomy
60	11.3	32.2	358	9.3	27.1	293	Abdominal	Hysterectomy
61	13.1	38.8	476	12.2	36.2	438	Abdominal	Hysterectomy
63	11	33.7	378	10.5	32.3	359	Abdominal	Hysterectomy
63	12.2	36.9	427	11.2	34.3	390	Abdominal	Hysterectomy
64	11.8	35.7	401	10.3	31.8	361	Abdominal	Hysterectomy
65	13	38.4	442	11.2	33.6	385	Abdominal	Hysterectomy
68	12.3	37.1	407	11.5	35.4	380	Abdominal	Hysterectomy
70	13.6	40.7	461	13	39.2	435	Abdominal	Hysterectomy
70	11.9	37.3	456	11	34.2	416	Abdominal	Hysterectomy
70	12	36	435	11.9	36	432	Abdominal	Hysterectomy
70	12.6	38.4	426	11.5	34.3	381	Abdominal	Hysterectomy
72	15.4	45.8	467	13.5	40.2	410	Abdominal	Hysterectomy
72	13.1	39.6	430	11.9	36.5	396	Abdominal	Hysterectomy
72	11.6	34.9	368	10.8	33.2	341	Abdominal	Hysterectomy
73	12.9	37.5	412	12.4	34.9	390	Abdominal	Hysterectomy
73	14.1	41.3	462	12.2	37.3	413	Abdominal	Hysterectomy
74	12.8	39.2	447	12.1	36.8	415	Abdominal	Hysterectomy
75	12.5	38.1	405	11.8	36.5	389	Abdominal	Hysterectomy
77	11.6	35.2	431	10.2	31	371	Abdominal	Hysterectomy
80	12	36.3	380	10.5	31.7	337	Abdominal	Hysterectomy
81	12.6	36.7	393	10.9	31.8	341	Abdominal	Hysterectomy
82	17.5	52.6	581	16.5	50.6	565	Abdominal	Hysterectomy
82	9.7	30.5	400	8.8	27.9	367	Abdominal	Hysterectomy
83	13.4	41.5	438	9.8	29.8	321	Abdominal	Hysterectomy
83	13.9	42.2	498	12.6	37.7	448	Abdominal	Hysterectomy
84	11.6	36.1	425	11.1	34.5	409	Abdominal	Hysterectomy
85	12	33.9	372	10.5	31.4	330	Abdominal	Hysterectomy
85	12.7	38.5	408	12.5	38	399	Abdominal	Hysterectomy
89	13.4	41.1	449	11.6	35.5	385	Abdominal	Hysterectomy
89	15.1	43.8	454	12.6	37.5	391	Abdominal	Hysterectomy
91	13.5	40	444	12.2	35.9	397	Abdominal	Hysterectomy
92	12.8	39.1	413	11.4	35	360	Abdominal	Hysterectomy
92	12.8	39.2	449	11.9	36.8	424	Abdominal	Hysterectomy
92	10.9	36.6	453	8.7	28.6	354	Abdominal	Hysterectomy
93	13	38.2	433	12.2	36	405	Abdominal	Hysterectomy
93	12.8	38.5	443	12.6	38.5	434	Abdominal	Hysterectomy
96	11.8	37.9	462	11.4	36.2	443	Abdominal	Hysterectomy
96	13	37.6	382	11.4	33.6	341	Abdominal	Hysterectomy
99	13	40.3	437	11.5	35.4	382	Abdominal	Hysterectomy
99	12.3	37.1	404	11.5	35.2	382	Abdominal	Hysterectomy
100	14.4	42.9	477	11.8	36.9	404	Abdominal	Hysterectomy
101	12.8	38.5	417	12.3	36.8	403	Abdominal	Hysterectomy
103	11.1	35	379	10.1	31.6	344	Abdominal	Hysterectomy
105	11.2	35.1	418	10.4	32.5	385	Abdominal	Hysterectomy
105	12.9	39.7	435	11.4	34.7	382	Abdominal	Hysterectomy
105	14.7	42.2	481	11.8	35	396	Abdominal	Hysterectomy
105	14.3	42.3	476	12.8	38.5	425	Abdominal	Hysterectomy
107	13.8	40	441	12.3	38.2	404	Abdominal	Hysterectomy
108	10.4	31.7	370	9.2	27.4	321	Abdominal	Hysterectomy
108	14.4	42.8	495	13	39	449	Abdominal	Hysterectomy
108	12.7	40.2	430	11.2	35.8	385	Abdominal	Hysterectomy
109	12.8	37.8	419	12.1	36.5	403	Abdominal	Hysterectomy
109	12.7	37.5	415	13	38.2	423	Abdominal	Hysterectomy
109	14.1	41.9	455	11.8	36	393	Abdominal	Hysterectomy
110	12.7	37.1	404	11.3	33.6	359	Abdominal	Hysterectomy
110	14.5	42.6	519	12.1	36.6	443	Abdominal	Hysterectomy
110	14	42	476	12.2	37.1	413	Abdominal	Hysterectomy
112	12.3	36.4	398	11	32.1	347	Abdominal	Hysterectomy
114	15	44.4	456	13.2	39.9	406	Abdominal	Hysterectomy
115	13.6	39	426	13.1	37	411	Abdominal	Hysterectomy
115	12.5	38.6	462	11.8	36.4	435	Abdominal	Hysterectomy
117	9.6	28.3	298	10.7	32	340	Abdominal	Hysterectomy
118	12.8	38.6	418	11.4	34.8	376	Abdominal	Hysterectomy
120	15	44.6	461	14.5	44.6	451	Abdominal	Hysterectomy
123	11.7	34.5	374	10.4	30.6	339	Abdominal	Hysterectomy
123	14.5	43.3	457	13.8	41.5	447	Abdominal	Hysterectomy
124	13.3	39.2	442	12.3	36	401	Abdominal	Hysterectomy
125	12.2	38.1	456	12	37.3	443	Abdominal	Hysterectomy
125	12.3	37.6	436	10.7	32.7	378	Abdominal	Hysterectomy
126	14	42.1	457	12.7	38.1	408	Abdominal	Hysterectomy
126	13.5	39.5	407	12.1	35.9	368	Abdominal	Hysterectomy
128	11.1	33.5	383	10.2	30.8	355	Abdominal	Hysterectomy
130	12.7	38.5	349	11.4	35.7	317	Abdominal	Hysterectomy
130	15.2	42.6	446	12.4	36.1	375	Abdominal	Hysterectomy
131	14.3	43.1	475	11.9	36.5	397	Abdominal	Hysterectomy
132	14.5	43.7	565	13.2	39.4	511	Abdominal	Hysterectomy
132	11.8	37.7	464	11	34.7	425	Abdominal	Hysterectomy
132	15	43.5	496	13.3	39.4	449	Abdominal	Hysterectomy
135	12.6	37.9	429	11.4	34.1	390	Abdominal	Hysterectomy
136	13.9	40.7	490	12.1	35.7	430	Abdominal	Hysterectomy
136	12.1	35.5	381	11.5	34.5	367	Abdominal	Hysterectomy
137	12	35.1	409	11.4	33.3	391	Abdominal	Hysterectomy
138	11.4	33.5	382	9.4	27.2	308	Abdominal	Hysterectomy
138	11.2	34.7	414	9.9	30.9	369	Abdominal	Hysterectomy
139	15.1	44.9	488	13.7	41.6	447	Abdominal	Hysterectomy
139	9.4	32.4	424	8.9	30.9	399	Abdominal	Hysterectomy
144	14.7	43	504	12.6	37.2	425	Abdominal	Hysterectomy
144	13.5	41	457	11.1	34.3	378	Abdominal	Hysterectomy
145	10.4	32.2	329	8.9	27.9	282	Abdominal	Hysterectomy
146	13.2	39.7	488	12.4	37.4	456	Abdominal	Hysterectomy
146	13.6	41.2	484	11.8	36.7	424	Abdominal	Hysterectomy
147	9.6	32	459	7.8	26.6	378	Abdominal	Hysterectomy
147	14.2	44.3	511	12.6	38.3	441	Abdominal	Hysterectomy
148	13	38.9	448	9.4	28.4	326	Abdominal	Hysterectomy
149	12.8	38.1	423	11.7	35.2	390	Abdominal	Hysterectomy
151	10.3	32.1	401	9.2	29.5	363	Abdominal	Hysterectomy
154	13.2	39.4	418	9.1	27.6	289	Abdominal	Hysterectomy
154	13.2	38.6	443	11.5	34.2	389	Abdominal	Hysterectomy
155	12.7	36.9	372	12	35.3	356	Abdominal	Hysterectomy
156	11.7	35.6	375	10.6	32.6	340	Abdominal	Hysterectomy
157	15.2	45.2	520	14.2	43	486	Abdominal	Hysterectomy
160	13.7	41	415	13.2	39.5	399	Abdominal	Hysterectomy
162	12.6	35.9	409	12.1	36.1	396	Abdominal	Hysterectomy
163	13.8	40.7	411	12.6	39	380	Abdominal	Hysterectomy
166	13.6	42.4	485	12.2	38.2	443	Abdominal	Hysterectomy
167	9.9	30	343	9.6	28.8	335	Abdominal	Hysterectomy
170	13.2	39.1	414	12.1	37.4	382	Abdominal	Hysterectomy
172	11.2	33.6	416	10.2	30.8	381	Abdominal	Hysterectomy
173	9.3	29.1	339	8.5	26.6	310	Abdominal	Hysterectomy
173	13.5	39.2	420	11.2	34.2	361	Abdominal	Hysterectomy
174	13.5	41.1	463	11.4	34	389	Abdominal	Hysterectomy
177	14.2	42.8	484	13.9	42.1	479	Abdominal	Hysterectomy
179	9.6	31.8	386	8.8	30	353	Abdominal	Hysterectomy
179	12.3	37.6	405	11.3	34.1	362	Abdominal	Hysterectomy
180	14.2	44	532	14	43.6	520	Abdominal	Hysterectomy
181	15.2	46	536	12.9	39.9	467	Abdominal	Hysterectomy
181	11.8	35.8	393	10.1	31.1	346	Abdominal	Hysterectomy
182	13.7	41.5	504	11.4	34.9	423	Abdominal	Hysterectomy
185	11.2	35.8	504	10.5	33.7	463	Abdominal	Hysterectomy
185	13.6	41.2	459	12.3	37.9	418	Abdominal	Hysterectomy
185	11.6	36.1	415	11.3	35.4	406	Abdominal	Hysterectomy
186	12.9	39	435	12.4	37.5	418	Abdominal	Hysterectomy
186	14.2	41.9	461	11.7	35	384	Abdominal	Hysterectomy
187	11.6	36.2	450	10.5	33.7	415	Abdominal	Hysterectomy
188	13.5	40.9	438	11.6	35.6	382	Abdominal	Hysterectomy
190	13.2	40.5	462	11.3	35	396	Abdominal	Hysterectomy
194	12.4	37.1	397	11.7	35.8	385	Abdominal	Hysterectomy
195	14.2	43.5	498	12.4	40.5	446	Abdominal	Hysterectomy
196	13.6	42.2	503	10.6	33	396	Abdominal	Hysterectomy
197	12.1	37.1	482	11	34	448	Abdominal	Hysterectomy
200	10.8	34.4	378	10.1	32.4	358	Abdominal	Hysterectomy
207	13.6	40.3	455	12.2	36.9	416	Abdominal	Hysterectomy
208	12	39.1	449	10.8	35.4	399	Abdominal	Hysterectomy
210	13.7	40.9	457	13	39.4	441	Abdominal	Hysterectomy
210	12.5	37.2	406	11.1	33.1	356	Abdominal	Hysterectomy
210	13.8	40.6	470	13.2	38.4	448	Abdominal	Hysterectomy
211	13	39.8	449	11.2	34.3	379	Abdominal	Hysterectomy
216	13.2	39.8	424	11.1	34.4	354	Abdominal	Hysterectomy
220	11.2	39.2	459	11.2	39.2	447	Abdominal	Hysterectomy
220	14.8	44.4	499	13.9	41.3	463	Abdominal	Hysterectomy
220	14.2	42.5	466	12.4	37.6	409	Abdominal	Hysterectomy
221	13.3	39.6	466	11.3	33.8	388	Abdominal	Hysterectomy
225	12.4	36.9	410	9.7	28.4	318	Abdominal	Hysterectomy
226	10.8	34.5	409	9.1	27.9	334	Abdominal	Hysterectomy
227	11.1	33.2	372	9.4	28.2	312	Abdominal	Hysterectomy
229	15.2	43.5	496	12.6	36.8	417	Abdominal	Hysterectomy
230	13.5	41.1	419	12	36.5	373	Abdominal	Hysterectomy
242	11.1	34.8	377	8.9	27.5	296	Abdominal	Hysterectomy
246	11.4	36.2	395	9.4	29.8	324	Abdominal	Hysterectomy
247	9.8	33.3	423	9.8	33.5	417	Abdominal	Hysterectomy
249	12.6	37.4	395	10.9	32.8	351	Abdominal	Hysterectomy
250	12.9	40.1	433	10.6	32.1	350	Abdominal	Hysterectomy
250	12.9	38.9	471	11.4	33.6	403	Abdominal	Hysterectomy
250	14.9	44.5	482	12.3	37.1	398	Abdominal	Hysterectomy
252	8.8	26.4	296	12.2	35.3	404	Abdominal	Hysterectomy
252	13.5	40.6	457	12.1	36.4	410	Abdominal	Hysterectomy
257	14.6	44	479	11.7	35.4	382	Abdominal	Hysterectomy
261	12.6	38.6	430	10.7	32.9	364	Abdominal	Hysterectomy
265	13.2	40.7	432	11.5	35.3	375	Abdominal	Hysterectomy
267	11.6	38.8	500	10.8	36.3	455	Abdominal	Hysterectomy
268	12.6	38.9	439	11.3	34.8	392	Abdominal	Hysterectomy
272	15.2	44.1	509	13.8	41.4	470	Abdominal	Hysterectomy
274	8.6	27	303	7.7	25.1	282	Abdominal	Hysterectomy
274	11.1	33.9	376	10.5	32.2	348	Abdominal	Hysterectomy
275	11.6	36	409	11.7	36.4	418	Abdominal	Hysterectomy
277	13.5	40.4	461	12.8	38.3	437	Abdominal	Hysterectomy
281	13.6	40.2	468	11.6	35.2	410	Abdominal	Hysterectomy
286	12.8	39.6	479	11.5	35	425	Abdominal	Hysterectomy
288	12.3	38	435	11	34.4	392	Abdominal	Hysterectomy
292	12.6	37.9	407	11.4	35.1	373	Abdominal	Hysterectomy
293	13.9	42.2	524	11.8	35.3	449	Abdominal	Hysterectomy
294	11.2	34.3	360	9.4	29	300	Abdominal	Hysterectomy
295	14.3	42.6	469	13.7	41.7	454	Abdominal	Hysterectomy
305	11.9	39.9	501	10.1	32.5	417	Abdominal	Hysterectomy
305	9.2	30.6	376	8.3	27.6	338	Abdominal	Hysterectomy
313	12	35.7	385	11.1	33.2	356	Abdominal	Hysterectomy
314	13.2	38.6	409	9.9	29.6	303	Abdominal	Hysterectomy
314	14.5	43.5	467	11.6	35.1	373	Abdominal	Hysterectomy
317	12.5	36.8	412	10.9	31.4	349	Abdominal	Hysterectomy
319	11.9	37.9	451	10.6	33.3	394	Abdominal	Hysterectomy
322	10.4	33.4	385	9.5	30.4	350	Abdominal	Hysterectomy
324	12.5	36.2	395	10.4	30	328	Abdominal	Hysterectomy
324	14.5	44.6	495	12.6	39.8	435	Abdominal	Hysterectomy
326	11.7	35.7	379	10.3	30	322	Abdominal	Hysterectomy
328	12.6	38.4	484	11	34.3	431	Abdominal	Hysterectomy
329	12.9	39.7	472	10	31.1	365	Abdominal	Hysterectomy
330	12	36.7	441	10.4	32.2	386	Abdominal	Hysterectomy
334	13.8	40.9	476	10.9	32.2	374	Abdominal	Hysterectomy
334	12.4	37.8	414	10.6	32.8	357	Abdominal	Hysterectomy
339	13.9	42.9	503	12.8	39.3	464	Abdominal	Hysterectomy
340	13.1	38	401	11.5	34.6	357	Abdominal	Hysterectomy
344	12.8	39.6	424	10.5	31.8	343	Abdominal	Hysterectomy
347	11.9	36.5	414	10.8	33.8	367	Abdominal	Hysterectomy
354	14.7	44.3	529	11.6	35.4	418	Abdominal	Hysterectomy
357	13.4	41.8	476	11.4	35.7	404	Abdominal	Hysterectomy
357	12.8	38.2	433	10.4	31.6	358	Abdominal	Hysterectomy
360	13.1	42.3	533	10.8	34.4	440	Abdominal	Hysterectomy
361	13	38.4	456	10.8	33.4	397	Abdominal	Hysterectomy
364	12.1	37.3	380	11.2	34.7	349	Abdominal	Hysterectomy
365	13.8	40.8	446	12.7	37.9	410	Abdominal	Hysterectomy
366	12.8	38.2	395	10.2	30.9	307	Abdominal	Hysterectomy
370	11.9	35.8	394	11.2	33.5	364	Abdominal	Hysterectomy
378	12.4	40.1	459	9.8	31.8	359	Abdominal	Hysterectomy
379	11.2	33.6	362	8.9	27.4	292	Abdominal	Hysterectomy
382	13.1	38.6	408	11.9	36.3	381	Abdominal	Hysterectomy
385	12.2	36.1	400	11	33.4	362	Abdominal	Hysterectomy
385	12.4	36.2	425	10.5	31.8	366	Abdominal	Hysterectomy
390	11.3	35.3	382	9	28.2	305	Abdominal	Hysterectomy
394	12.4	37.6	436	11.5	35.5	406	Abdominal	Hysterectomy
395	13	38.9	410	10.5	32.7	343	Abdominal	Hysterectomy
395	12.7	38	435	11.9	34.6	401	Abdominal	Hysterectomy
398	11.1	35.6	425	10.5	34	401	Abdominal	Hysterectomy
400	14.4	42.8	486	13.6	40.2	462	Abdominal	Hysterectomy
400	14.1	43.1	506	10.9	33.2	391	Abdominal	Hysterectomy
401	13.7	40.2	432	12	35.3	383	Abdominal	Hysterectomy
407	13	38.7	433	11.2	33.9	374	Abdominal	Hysterectomy
410	12.5	36.6	411	12.5	36.7	409	Abdominal	Hysterectomy
415	11.9	36.3	416	10.4	31.9	364	Abdominal	Hysterectomy
415	12.9	38.6	466	12	35.5	429	Abdominal	Hysterectomy
430	13.7	41.7	455	9.7	29.6	319	Abdominal	Hysterectomy
434	15.3	44.8	496	12.7	37.3	414	Abdominal	Hysterectomy
435	9.8	32.2	349	9	30.2	326	Abdominal	Hysterectomy
444	8.8	28.6	331	8	25.9	293	Abdominal	Hysterectomy
460	13.4	40.4	454	10.2	31.3	346	Abdominal	Hysterectomy
462	11.1	35.4	432	9.4	30.2	365	Abdominal	Hysterectomy
463	12.4	37.5	409	9.7	29.6	325	Abdominal	Hysterectomy
466	14.4	42	461	10.5	31.3	347	Abdominal	Hysterectomy
468	14.4	42.4	506	11.8	35.1	425	Abdominal	Hysterectomy
471	11.6	36	393	10.8	33.1	369	Abdominal	Hysterectomy
473	13.3	39.9	454	12.3	37.2	424	Abdominal	Hysterectomy
488	12.4	37.8	416	11	33.9	367	Abdominal	Hysterectomy
491	11.9	35.7	391	10.4	30.8	337	Abdominal	Hysterectomy
491	13.2	41.7	496	10.5	34.2	413	Abdominal	Hysterectomy
493	10.7	34.6	380	10.6	34.6	376	Abdominal	Hysterectomy
498	13	38	389	11.3	34.1	344	Abdominal	Hysterectomy
503	8.8	29.7	318	7.1	23.9	255	Abdominal	Hysterectomy
506	12.4	39.6	498	8.2	25.6	319	Abdominal	Hysterectomy
508	11.9	35.3	370	10.8	32.9	339	Abdominal	Hysterectomy
515	12.4	39.6	502	9.9	32.3	403	Abdominal	Hysterectomy
517	10.7	33.1	392	9.5	29.2	346	Abdominal	Hysterectomy
517	13.2	39.1	418	11.6	35.2	372	Abdominal	Hysterectomy
542	12.4	38.1	401	10.3	31.8	340	Abdominal	Hysterectomy
549	12.7	39.4	487	11.5	35.8	441	Abdominal	Hysterectomy
562	12.3	37.2	434	11.2	33.9	401	Abdominal	Hysterectomy
567	12.7	39.6	436	11.2	34.9	378	Abdominal	Hysterectomy
568	13.9	41.4	464	11.4	34.8	387	Abdominal	Hysterectomy
570	13.8	39.5	434	10.2	29.5	326	Abdominal	Hysterectomy
570	13.5	41.3	434	12	37.1	388	Abdominal	Hysterectomy
572	12.9	37.8	472	11.6	34.7	442	Abdominal	Hysterectomy
573	10.6	34.2	442	10.3	32.8	424	Abdominal	Hysterectomy
574	11	35.2	465	9.6	30.2	398	Abdominal	Hysterectomy
585	9.7	29.6	333	6.8	20.7	230	Abdominal	Hysterectomy
586	12.7	38.4	438	10.2	30.4	347	Abdominal	Hysterectomy
589	10	31.7	345	9.1	28.4	307	Abdominal	Hysterectomy
590	12.2	35.8	391	9.8	28.8	314	Abdominal	Hysterectomy
604	12.7	37.5	426	10.6	31.6	358	Abdominal	Hysterectomy
606	12	38.1	406	9.8	31.6	337	Abdominal	Hysterectomy
607	12.4	38.3	428	10.9	33.5	378	Abdominal	Hysterectomy
610	13.3	39.3	432	10.2	31.2	343	Abdominal	Hysterectomy
613	11.5	36.9	424	10.2	33.2	378	Abdominal	Hysterectomy
630	13.7	40.5	522	10.8	32.8	417	Abdominal	Hysterectomy
647	13.4	40.1	442	11.4	34.7	379	Abdominal	Hysterectomy
651	12.8	38.1	437	9.6	29.7	338	Abdominal	Hysterectomy
670	7.9	23.9	259	9	27.2	299	Abdominal	Hysterectomy
677	10.3	31	341	9.6	28.5	314	Abdominal	Hysterectomy
687	11.5	37.1	461	8.3	27.1	326	Abdominal	Hysterectomy
693	11.4	35	389	10.4	31.9	357	Abdominal	Hysterectomy
699	13.6	41.8	461	10.4	32.5	355	Abdominal	Hysterectomy
720	11.8	37	402	9.3	28.9	312	Abdominal	Hysterectomy
722	12.4	37.6	412	11	34.3	371	Abdominal	Hysterectomy
723	13.7	41	447	11.9	35.2	391	Abdominal	Hysterectomy
723	12.4	38.1	435	8	24.9	277	Abdominal	Hysterectomy
760	13.7	39.9	453	12.2	36	410	Abdominal	Hysterectomy
762	14.4	42.7	491	12.2	36.8	412	Abdominal	Hysterectomy
770	14.2	42.2	532	11.8	35.1	445	Abdominal	Hysterectomy
779	12.4	40.3	513	10.7	35.1	444	Abdominal	Hysterectomy
787	14.5	44.1	457	10.4	32.2	334	Abdominal	Hysterectomy
790	12.1	36.6	424	9	28.8	321	Abdominal	Hysterectomy
791	12.3	38.1	420	11.2	34	378	Abdominal	Hysterectomy
818	9.9	34.3	396	10.7	35.7	404	Abdominal	Hysterectomy
818	13.5	39.6	424	10.3	30.7	326	Abdominal	Hysterectomy
823	12.3	37.5	421	10.4	32.5	354	Abdominal	Hysterectomy
835	11.5	35.8	402	10.4	32.5	362	Abdominal	Hysterectomy
854	13.6	42.4	515	11.4	35.6	431	Abdominal	Hysterectomy
862	13.9	40.6	462	10	29.8	337	Abdominal	Hysterectomy
876	11.5	36.6	428	9.8	30.5	363	Abdominal	Hysterectomy
886	14.3	43	458	11.1	32.8	349	Abdominal	Hysterectomy
905	12.7	37.9	431	10.1	30	340	Abdominal	Hysterectomy
923	13.4	39.7	449	9.6	28.7	321	Abdominal	Hysterectomy
925	10.7	32.8	381	9.1	28.6	324	Abdominal	Hysterectomy
952	12.2	36.3	418	8.8	26.7	302	Abdominal	Hysterectomy
954	15.3	43.6	512	10.9	31.5	367	Abdominal	Hysterectomy
8	14.3	43.3	484	11.9	36.2	406	Abdominal	Myomectomy
17	12.5	36	393	10.1	30.5	323	Abdominal	Myomectomy
21	11.8	35.8	393	10.8	32.6	357	Abdominal	Myomectomy
23	15	44.3	528	14.4	42.1	503	Abdominal	Myomectomy
25	14.3	43.5	484	12.7	39.7	433	Abdominal	Myomectomy
25	11.5	33	359	9.8	28.9	311	Abdominal	Myomectomy
29	13.2	38.8	426	11.8	35.3	382	Abdominal	Myomectomy
32	12.2	38.4	462	11.3	35.9	428	Abdominal	Myomectomy
32	14.2	41.9	463	12.5	36.9	407	Abdominal	Myomectomy
37	13.4	41	442	11.5	34.3	374	Abdominal	Myomectomy
39	11.3	33	334	10.9	32.1	318	Abdominal	Myomectomy
42	12.1	38.4	409	11.5	37	392	Abdominal	Myomectomy
45	11.4	34.8	409	11.2	33.5	402	Abdominal	Myomectomy
50	14.3	42.5	523	11.9	35.2	428	Abdominal	Myomectomy
52	14.4	41.3	458	12.7	36.4	402	Abdominal	Myomectomy
54	13.2	40.1	455	11.7	35.1	403	Abdominal	Myomectomy
59	11.5	36	472	10.8	33.9	444	Abdominal	Myomectomy
60	12.5	38.6	430	12.5	37.5	420	Abdominal	Myomectomy
66	12.7	37.5	457	10.5	31.5	384	Abdominal	Myomectomy
67	13.3	39.4	442	9.7	28.2	322	Abdominal	Myomectomy
68	13.4	37.9	428	10.3	30.4	341	Abdominal	Myomectomy
68	12.1	38.2	475	9.8	30.9	389	Abdominal	Myomectomy
70	12.1	38.4	464	10.2	31.8	383	Abdominal	Myomectomy
73	10.8	34.8	439	9.9	32.6	405	Abdominal	Myomectomy
74	12.7	38.4	409	11.8	36	380	Abdominal	Myomectomy
75	13.2	40.3	482	10	30.6	368	Abdominal	Myomectomy
78	13.3	39.4	426	12.6	38	406	Abdominal	Myomectomy
85	12.5	38	428	11.6	35.2	393	Abdominal	Myomectomy
85	13	39.6	450	11.6	36.2	412	Abdominal	Myomectomy
100	12.1	35.7	399	10.6	30.9	345	Abdominal	Myomectomy
102	11.9	36.5	433	10.7	33	383	Abdominal	Myomectomy
105	13.5	40.4	435	11.1	33.1	356	Abdominal	Myomectomy
105	12.9	38.4	434	12.6	37.9	426	Abdominal	Myomectomy
113	11.4	35.8	399	10.7	32.8	366	Abdominal	Myomectomy
116	10.7	32.9	391	8.6	26.6	314	Abdominal	Myomectomy
120	12.9	39.4	420	10.3	31.5	334	Abdominal	Myomectomy
125	10.5	33.6	380	9.2	30.5	333	Abdominal	Myomectomy
130	13	39.4	451	11.9	36.4	416	Abdominal	Myomectomy
135	12.2	37.4	437	9.1	27.5	323	Abdominal	Myomectomy
142	13.1	38.9	437	11.6	34.7	399	Abdominal	Myomectomy
145	13.1	38.1	453	11.5	33.9	400	Abdominal	Myomectomy
150	13.3	39.9	503	11.6	34.9	438	Abdominal	Myomectomy
153	9.8	32.6	438	8.4	27.9	376	Abdominal	Myomectomy
154	12.5	37.7	453	10.9	32.9	393	Abdominal	Myomectomy
162	13.8	42.4	508	11.5	34.9	411	Abdominal	Myomectomy
165	12.1	37.1	422	10.9	33	379	Abdominal	Myomectomy
166	11.6	34.2	364	10.4	31.1	321	Abdominal	Myomectomy
167	12.8	39.1	437	12.2	37.1	418	Abdominal	Myomectomy
171	14.6	43.2	500	11.3	33.6	392	Abdominal	Myomectomy
182	10.2	33.4	462	8.9	30	407	Abdominal	Myomectomy
188	12.4	37.2	437	12	36.1	419	Abdominal	Myomectomy
190	14.4	41	449	12.8	37.7	406	Abdominal	Myomectomy
192	11.1	34.4	380	9.3	28.7	313	Abdominal	Myomectomy
200	12.3	37.4	383	11.7	35.9	365	Abdominal	Myomectomy
201	14.1	42.9	468	12.9	39.2	429	Abdominal	Myomectomy
202	12.5	37.1	439	11.5	34.5	413	Abdominal	Myomectomy
205	14.9	44.8	486	12.7	38.5	417	Abdominal	Myomectomy
210	13.8	40	448	12.7	36.4	412	Abdominal	Myomectomy
221	12.5	37.3	441	10.8	32.1	377	Abdominal	Myomectomy
222	12.8	39.5	458	11.1	33.7	385	Abdominal	Myomectomy
225	13.1	38.2	427	10.8	32.2	352	Abdominal	Myomectomy
227	14.2	42.3	454	12.2	37	393	Abdominal	Myomectomy
233	11.3	33.7	352	10.1	30	322	Abdominal	Myomectomy
235	12.9	38.1	430	12.1	36.1	401	Abdominal	Myomectomy
251	13.3	39.8	442	10.2	30.9	340	Abdominal	Myomectomy
253	12	36.7	433	9.2	27.7	325	Abdominal	Myomectomy
256	12	36.6	391	5.9	18	191	Abdominal	Myomectomy
256	12.5	36.7	413	10.1	29.8	334	Abdominal	Myomectomy
274	12.1	37.2	422	11.6	35.1	403	Abdominal	Myomectomy
280	10.7	34.5	443	9.4	31	391	Abdominal	Myomectomy
282	10.4	32.3	427	9	27.7	369	Abdominal	Myomectomy
285	13.3	40.7	466	11.5	35.5	404	Abdominal	Myomectomy
292	14.9	44.7	475	12.9	39.4	409	Abdominal	Myomectomy
293	12.8	38.3	436	10.5	31.7	361	Abdominal	Myomectomy
296	12.1	36.9	393	11.1	34.1	365	Abdominal	Myomectomy
298	14.6	42.9	492	9.5	28.4	326	Abdominal	Myomectomy
306	13.6	40.5	464	11.4	33.7	391	Abdominal	Myomectomy
310	12.7	39.8	473	10.1	32.1	373	Abdominal	Myomectomy
325	12.6	37.2	422	10.5	32.4	363	Abdominal	Myomectomy
325	13.1	38.2	429	11	32.1	363	Abdominal	Myomectomy
326	12.9	40	455	10.5	32.1	368	Abdominal	Myomectomy
331	13.8	41.1	441	9	27.1	289	Abdominal	Myomectomy
340	13.6	41.2	458	12.1	37.4	419	Abdominal	Myomectomy
343	11.8	37.2	402	9.8	29.8	328	Abdominal	Myomectomy
345	13.3	40	460	10.8	33.2	380	Abdominal	Myomectomy
371	14.5	43.8	501	11.3	34.9	387	Abdominal	Myomectomy
382	11.8	35	367	10.9	32.5	338	Abdominal	Myomectomy
399	14.1	43.3	513	12	36.7	436	Abdominal	Myomectomy
404	13.1	38	445	9.1	27	311	Abdominal	Myomectomy
436	10.9	31.9	348	8.5	25.7	273	Abdominal	Myomectomy
475	13.7	39.9	463	10.4	30.4	351	Abdominal	Myomectomy
486	13.9	41	436	11.3	33.8	362	Abdominal	Myomectomy
500	11.6	34.5	348	6.4	19.4	194	Abdominal	Myomectomy
509	12.6	37.8	406	11.3	33.8	361	Abdominal	Myomectomy
514	12.5	38.8	481	10.8	33.7	426	Abdominal	Myomectomy
530	11.9	35.8	399	9.1	26.5	296	Abdominal	Myomectomy
607	14	41	465	12.1	36	405	Abdominal	Myomectomy
615	11.6	34.8	393	8.3	25.2	281	Abdominal	Myomectomy
636	12.6	38.7	451	9.7	30	347	Abdominal	Myomectomy
649	11.7	36	443	9.9	30.4	380	Abdominal	Myomectomy
685	12.6	36.8	397	10.5	31.7	335	Abdominal	Myomectomy
704	13	38.6	422	9.4	28.5	314	Abdominal	Myomectomy
715	12.2	36.3	422	10.9	31.6	371	Abdominal	Myomectomy
725	13.6	40.1	455	10.1	29.9	342	Abdominal	Myomectomy
927	13.9	39.3	451	9.1	26.7	296	Abdominal	Myomectomy
0	12.8	37	401	12	36.8	386	Laparoscopic	Cystectomy or USO
0	14	41	443	13.2	39.3	423	Laparoscopic	Cystectomy or USO
0	13	37.9	422	11.6	34.4	374	Laparoscopic	Cystectomy or USO
0	12.1	36.6	412	10.5	32.8	361	Laparoscopic	Cystectomy or USO
0	14.5	42.9	485	13.6	41.1	455	Laparoscopic	Cystectomy or USO
0	12.7	39	423	12.5	38	409	Laparoscopic	Cystectomy or USO
0	12.3	36.3	392	11.4	33.3	361	Laparoscopic	Cystectomy or USO
0	13.1	40.6	451	12.2	38	419	Laparoscopic	Cystectomy or USO
0	13.5	40.3	421	11.7	35.8	363	Laparoscopic	Cystectomy or USO
0	13	38.1	433	11.1	33.2	374	Laparoscopic	Cystectomy or USO
0	13.7	41.7	451	12.4	37.9	413	Laparoscopic	Cystectomy or USO
0	12.5	37.1	422	11.1	33.5	375	Laparoscopic	Cystectomy or USO
0	11.4	35.4	428	10.7	33.8	399	Laparoscopic	Cystectomy or USO
0	14.5	43.1	466	12.4	38.3	405	Laparoscopic	Cystectomy or USO
0	13.1	39.4	433	12.8	38.2	421	Laparoscopic	Cystectomy or USO
0	11.1	33.6	354	10	30.3	316	Laparoscopic	Cystectomy or USO
0	12.4	37.5	399	10.8	32.9	347	Laparoscopic	Cystectomy or USO
0	13.2	38.8	430	12.8	38	416	Laparoscopic	Cystectomy or USO
0	13.8	41.4	474	12.1	37.4	422	Laparoscopic	Cystectomy or USO
0	11	34.8	457	10.4	33.1	432	Laparoscopic	Cystectomy or USO
0	11.4	35	426	10.2	31.3	380	Laparoscopic	Cystectomy or USO
0	12.6	38.6	448	12	37.7	425	Laparoscopic	Cystectomy or USO
0	12.2	36.3	395	10.5	32.7	349	Laparoscopic	Cystectomy or USO
0	12.2	35.8	397	11.2	32.9	360	Laparoscopic	Cystectomy or USO
0	13.6	40.6	458	12.3	37.7	421	Laparoscopic	Cystectomy or USO
0	13.5	40.6	453	11.9	36.2	400	Laparoscopic	Cystectomy or USO
0	13	37.7	441	11.8	34.4	399	Laparoscopic	Cystectomy or USO
0	12.4	38.2	465	11.5	36	433	Laparoscopic	Cystectomy or USO
0	9.8	31.8	429	9.2	30.4	403	Laparoscopic	Cystectomy or USO
0	12.9	38.3	422	11.6	35.5	387	Laparoscopic	Cystectomy or USO
0	12.5	37.4	443	10.9	33.3	385	Laparoscopic	Cystectomy or USO
0	12.7	37.2	400	11.4	33.9	356	Laparoscopic	Cystectomy or USO
0	12.6	38.1	440	12.3	37.4	431	Laparoscopic	Cystectomy or USO
0	11.7	34.4	371	10.4	30.3	320	Laparoscopic	Cystectomy or USO
0	14.2	43.6	453	12.2	37.6	390	Laparoscopic	Cystectomy or USO
0	12.8	39.3	427	12.1	37.5	400	Laparoscopic	Cystectomy or USO
0	14.4	41.8	468	12.4	37.3	404	Laparoscopic	Cystectomy or USO
0	11.6	35.6	396	11.2	34.7	380	Laparoscopic	Cystectomy or USO
0	12.9	38.2	429	11.4	34.4	385	Laparoscopic	Cystectomy or USO
0	10.9	33.6	378	10.2	31.8	352	Laparoscopic	Cystectomy or USO
0	13.1	37.4	401	12.6	36.1	381	Laparoscopic	Cystectomy or USO
0	12.8	38.6	396	11.7	34.4	353	Laparoscopic	Cystectomy or USO
0	12	35.5	396	10.9	31.9	358	Laparoscopic	Cystectomy or USO
0	13.4	39.6	452	12.4	36.8	418	Laparoscopic	Cystectomy or USO
0	11.7	35.4	425	11.1	34.1	407	Laparoscopic	Cystectomy or USO
0	11.6	33.7	382	10.4	30.8	343	Laparoscopic	Cystectomy or USO
0	12.8	38.2	479	12.6	38.5	485	Laparoscopic	Cystectomy or USO
0	12.4	36.7	422	11.8	34.6	402	Laparoscopic	Cystectomy or USO
0	13	38.2	437	12	35.9	410	Laparoscopic	Cystectomy or USO
0	13.2	40.9	448	12.5	38.7	424	Laparoscopic	Cystectomy or USO
0	12.4	37.5	418	11.9	35.8	398	Laparoscopic	Cystectomy or USO
0	12.7	39.5	443	11.7	36.4	409	Laparoscopic	Cystectomy or USO
0	13	40.1	449	12.6	38.3	432	Laparoscopic	Cystectomy or USO
1	12	36.4	409	11	33.3	374	Laparoscopic	Cystectomy or USO
1	13.7	40.3	429	12.1	37	391	Laparoscopic	Cystectomy or USO
1	14.2	41.8	466	12.9	38	424	Laparoscopic	Cystectomy or USO
1	13.6	39.7	466	12	35.4	412	Laparoscopic	Cystectomy or USO
1	13.1	37.6	442	11.3	32.8	385	Laparoscopic	Cystectomy or USO
1	13.1	39.1	424	11.2	33.2	356	Laparoscopic	Cystectomy or USO
1	12.9	40	478	11.6	35.6	416	Laparoscopic	Cystectomy or USO
2	15	43.1	472	13.2	39.2	416	Laparoscopic	Cystectomy or USO
2	12.8	38.5	435	11.9	37.1	412	Laparoscopic	Cystectomy or USO
2	12.9	38.2	416	11.7	35.1	375	Laparoscopic	Cystectomy or USO
2	12.9	39.1	468	10.6	33.1	390	Laparoscopic	Cystectomy or USO
2	11.8	34.5	372	10	29.6	317	Laparoscopic	Cystectomy or USO
2	12.9	37.4	418	12.1	34.7	394	Laparoscopic	Cystectomy or USO
2	12.6	37.4	427	12.6	37.3	425	Laparoscopic	Cystectomy or USO
2	12	35.7	434	11.2	33.1	401	Laparoscopic	Cystectomy or USO
2	15	41.6	459	12.8	36.9	405	Laparoscopic	Cystectomy or USO
2	11	33	337	10.7	31.9	327	Laparoscopic	Cystectomy or USO
2	9.6	29.6	329	9	28	313	Laparoscopic	Cystectomy or USO
2	12.4	36.7	472	12.2	37.5	471	Laparoscopic	Cystectomy or USO
2	13	38.5	426	11.7	35.2	393	Laparoscopic	Cystectomy or USO
2	13.8	40.4	432	12.4	37.1	392	Laparoscopic	Cystectomy or USO
2	13.1	37.6	427	11.8	35.1	396	Laparoscopic	Cystectomy or USO
2	11.7	35.4	375	12.3	37.2	397	Laparoscopic	Cystectomy or USO
2	13	39.9	442	12.8	39.2	434	Laparoscopic	Cystectomy or USO
2	13.5	42	483	12.5	38.8	448	Laparoscopic	Cystectomy or USO
2	12.3	37.4	400	11.6	35.1	376	Laparoscopic	Cystectomy or USO
2	13.2	38.6	447	13.5	40.2	453	Laparoscopic	Cystectomy or USO
2	12.9	35.7	396	12.1	34.8	378	Laparoscopic	Cystectomy or USO
2	12.7	40	418	12.2	37.7	409	Laparoscopic	Cystectomy or USO
2	12.5	38.6	425	11.7	35.4	388	Laparoscopic	Cystectomy or USO
2	12.6	37.4	410	11.9	35.7	392	Laparoscopic	Cystectomy or USO
2	12.8	38.5	428	10.4	30.2	343	Laparoscopic	Cystectomy or USO
3	11.4	35.2	381	10.7	33.1	363	Laparoscopic	Cystectomy or USO
3	13.9	39.9	468	11.7	34.3	398	Laparoscopic	Cystectomy or USO
3	12.4	37.4	386	11.6	34.5	359	Laparoscopic	Cystectomy or USO
3	13.6	39.5	469	12.8	38.2	445	Laparoscopic	Cystectomy or USO
3	11.5	34.5	408	11.3	34.8	402	Laparoscopic	Cystectomy or USO
3	13.1	38.7	422	12.8	37.7	409	Laparoscopic	Cystectomy or USO
3	13.8	41.2	431	12.8	40.4	410	Laparoscopic	Cystectomy or USO
3	12.7	38.4	422	12.3	37.2	406	Laparoscopic	Cystectomy or USO
3	12.4	37.1	391	12.1	36.5	380	Laparoscopic	Cystectomy or USO
3	10.6	32.9	383	10.2	31.8	368	Laparoscopic	Cystectomy or USO
3	10.6	33.7	478	10.5	33.6	475	Laparoscopic	Cystectomy or USO
3	10.9	35.3	475	9.9	32.5	432	Laparoscopic	Cystectomy or USO
3	13.7	39.8	443	12.2	36.7	405	Laparoscopic	Cystectomy or USO
3	13.3	36.7	431	11.9	33.9	388	Laparoscopic	Cystectomy or USO
3	12.5	36.3	392	12.1	36.2	380	Laparoscopic	Cystectomy or USO
3	12.9	37	419	11.8	34.2	379	Laparoscopic	Cystectomy or USO
3	13	40.6	455	12.8	39	438	Laparoscopic	Cystectomy or USO
3	12.9	37	418	11.3	33.8	372	Laparoscopic	Cystectomy or USO
3	12.1	35.6	409	10.6	31.3	366	Laparoscopic	Cystectomy or USO
3	14.9	43.7	479	13	38.8	424	Laparoscopic	Cystectomy or USO
3	13.7	39.5	454	11.6	34.1	397	Laparoscopic	Cystectomy or USO
3	13.7	40	428	12.7	38	407	Laparoscopic	Cystectomy or USO
3	14.1	42.2	515	13	39.4	485	Laparoscopic	Cystectomy or USO
3	13.4	40.4	449	13.2	40.7	444	Laparoscopic	Cystectomy or USO
3	12.4	37	413	11.6	34.7	384	Laparoscopic	Cystectomy or USO
3	11.5	36.5	423	11.7	36.3	420	Laparoscopic	Cystectomy or USO
3	11.1	34.9	427	10.5	33.8	407	Laparoscopic	Cystectomy or USO
3	10	31.5	377	9.6	30.6	365	Laparoscopic	Cystectomy or USO
4	12.1	37.4	428	10.2	30.9	356	Laparoscopic	Cystectomy or USO
4	12.8	39.3	447	11.7	36.2	403	Laparoscopic	Cystectomy or USO
4	12.9	38	440	11.5	33.6	382	Laparoscopic	Cystectomy or USO
4	13.6	40.4	447	12.3	37	407	Laparoscopic	Cystectomy or USO
4	13.1	39.2	434	12.2	36.3	407	Laparoscopic	Cystectomy or USO
4	12.8	36.7	395	11.7	35.2	372	Laparoscopic	Cystectomy or USO
4	12.9	39.1	425	11.2	34.5	372	Laparoscopic	Cystectomy or USO
4	12.1	38.1	465	11.1	34.8	423	Laparoscopic	Cystectomy or USO
5	12.6	38	449	12.6	38	445	Laparoscopic	Cystectomy or USO
5	14.4	42.3	486	12.6	38.5	435	Laparoscopic	Cystectomy or USO
5	12.4	38.2	433	11.5	35.5	403	Laparoscopic	Cystectomy or USO
5	12.6	38	406	10.9	33.9	355	Laparoscopic	Cystectomy or USO
5	13	37.9	431	12.2	35.8	404	Laparoscopic	Cystectomy or USO
5	12.3	38	422	11	34.6	377	Laparoscopic	Cystectomy or USO
5	13.2	40.6	439	12.1	38.1	408	Laparoscopic	Cystectomy or USO
5	12.3	37.2	405	11.5	35	379	Laparoscopic	Cystectomy or USO
5	13.9	39.7	426	11.7	34.1	359	Laparoscopic	Cystectomy or USO
5	15	43.7	500	12.8	38.6	432	Laparoscopic	Cystectomy or USO
5	12.3	37.7	435	11.5	35.7	407	Laparoscopic	Cystectomy or USO
5	13.3	39.6	431	11.9	35.8	390	Laparoscopic	Cystectomy or USO
5	11.6	35.6	573	10.7	33.1	531	Laparoscopic	Cystectomy or USO
5	12.3	36.7	441	11.3	34.4	409	Laparoscopic	Cystectomy or USO
5	13.1	39.1	430	12.3	36.8	401	Laparoscopic	Cystectomy or USO
5	12.7	38.1	421	11.9	36.6	401	Laparoscopic	Cystectomy or USO
5	12.7	38.1	432	12.1	36.4	409	Laparoscopic	Cystectomy or USO
5	12.6	37.3	425	11.9	35.9	405	Laparoscopic	Cystectomy or USO
5	13.1	39	453	11.8	35.5	404	Laparoscopic	Cystectomy or USO
5	13.5	40.4	445	13.9	41.6	457	Laparoscopic	Cystectomy or USO
5	12.7	37.7	417	12.6	38.2	417	Laparoscopic	Cystectomy or USO
5	11.1	35.2	412	10.3	32.7	378	Laparoscopic	Cystectomy or USO
5	13.1	40.3	438	12.4	38.5	415	Laparoscopic	Cystectomy or USO
5	14.6	43.9	434	13.8	42.5	410	Laparoscopic	Cystectomy or USO
5	13.3	39.9	425	12.7	38	402	Laparoscopic	Cystectomy or USO
5	13.5	41.1	432	13	40.1	418	Laparoscopic	Cystectomy or USO
5	11	34.5	429	10.4	32.7	398	Laparoscopic	Cystectomy or USO
5	13.6	40.1	455	12.6	37.4	418	Laparoscopic	Cystectomy or USO
5	13.3	39.9	434	13.1	39.3	424	Laparoscopic	Cystectomy or USO
5	11.7	33.9	368	10.2	30.1	323	Laparoscopic	Cystectomy or USO
5	12.6	37.2	425	11.2	33.8	381	Laparoscopic	Cystectomy or USO
5	12.5	37.1	411	11.8	35.2	389	Laparoscopic	Cystectomy or USO
5	11.4	34.8	483	9.7	30.5	419	Laparoscopic	Cystectomy or USO
5	12.2	36	396	11.9	35.8	387	Laparoscopic	Cystectomy or USO
5	12.5	36.4	421	11.6	33.9	394	Laparoscopic	Cystectomy or USO
5	13.6	40.3	453	12.8	37.1	425	Laparoscopic	Cystectomy or USO
5	13.9	39.7	437	13.9	40.8	449	Laparoscopic	Cystectomy or USO
5	13.5	39.6	471	11.9	35.6	423	Laparoscopic	Cystectomy or USO
5	13.7	39.3	469	12.1	36	418	Laparoscopic	Cystectomy or USO
5	13.4	40.2	429	12.1	35.9	393	Laparoscopic	Cystectomy or USO
5	13	38.6	429	12.3	36.7	409	Laparoscopic	Cystectomy or USO
5	13.1	39.5	456	11.9	36	416	Laparoscopic	Cystectomy or USO
5	12.7	39.3	452	11.1	34.3	397	Laparoscopic	Cystectomy or USO
5	11.7	35.3	394	10.9	32.7	367	Laparoscopic	Cystectomy or USO
5	13.1	40.6	496	12.4	38.1	473	Laparoscopic	Cystectomy or USO
5	13.1	39.3	441	11.3	32.6	374	Laparoscopic	Cystectomy or USO
5	12.7	38.4	438	12.6	38.1	435	Laparoscopic	Cystectomy or USO
5	13.9	41.5	473	12.1	37.2	425	Laparoscopic	Cystectomy or USO
5	14.1	41.8	467	13.7	40.9	456	Laparoscopic	Cystectomy or USO
5	13.7	41.7	462	11.7	36.2	402	Laparoscopic	Cystectomy or USO
5	13.5	39.9	444	11.9	36	394	Laparoscopic	Cystectomy or USO
5	12.1	36.3	401	11.3	33.8	368	Laparoscopic	Cystectomy or USO
5	13.1	37.3	409	12.5	35.9	391	Laparoscopic	Cystectomy or USO
5	13.6	41.1	460	12.5	39.1	427	Laparoscopic	Cystectomy or USO
5	12.8	37	443	12	35.1	415	Laparoscopic	Cystectomy or USO
5	13.1	39.4	453	12	36.6	416	Laparoscopic	Cystectomy or USO
5	14.5	42.7	498	13.3	40.4	456	Laparoscopic	Cystectomy or USO
5	10.7	31.2	343	10.8	31.5	339	Laparoscopic	Cystectomy or USO
5	13.5	39.5	467	12.4	37.1	438	Laparoscopic	Cystectomy or USO
5	12.7	39	427	11.4	35.3	386	Laparoscopic	Cystectomy or USO
5	13.2	40.6	447	11.5	36.3	390	Laparoscopic	Cystectomy or USO
5	14.1	42.9	465	12.1	37	398	Laparoscopic	Cystectomy or USO
5	13.3	38.7	428	12.1	35.9	396	Laparoscopic	Cystectomy or USO
5	12.8	37.6	426	12	36.5	410	Laparoscopic	Cystectomy or USO
6	12.9	38.3	445	11.3	33.8	387	Laparoscopic	Cystectomy or USO
6	11.6	34.9	396	10.6	32.3	364	Laparoscopic	Cystectomy or USO
6	11	35.4	486	11.2	36	491	Laparoscopic	Cystectomy or USO
6	10.5	31.1	351	11	33.1	360	Laparoscopic	Cystectomy or USO
6	11.2	34.3	435	10.7	32.9	413	Laparoscopic	Cystectomy or USO
6	13.2	39.1	487	12.8	38.6	475	Laparoscopic	Cystectomy or USO
6	14.4	41.8	485	13.1	38.7	451	Laparoscopic	Cystectomy or USO
6	12	35.6	410	11.8	34.9	404	Laparoscopic	Cystectomy or USO
6	12.4	38.1	463	12.1	36.7	444	Laparoscopic	Cystectomy or USO
6	10.8	32.4	344	10.4	31.7	336	Laparoscopic	Cystectomy or USO
6	12.8	38.9	444	10.7	33.7	375	Laparoscopic	Cystectomy or USO
6	13.4	39.5	424	11.8	35.8	373	Laparoscopic	Cystectomy or USO
6	11.8	35.5	402	11.2	33.1	388	Laparoscopic	Cystectomy or USO
7	13.6	38.8	438	12.3	36	404	Laparoscopic	Cystectomy or USO
7	14.1	42	501	12.3	38.6	452	Laparoscopic	Cystectomy or USO
7	13.5	39.9	431	13.1	38.6	423	Laparoscopic	Cystectomy or USO
7	12.9	38.1	418	11.6	35.1	377	Laparoscopic	Cystectomy or USO
7	12.8	37.8	394	12	35.9	369	Laparoscopic	Cystectomy or USO
7	14.6	44.9	492	12.1	36.7	401	Laparoscopic	Cystectomy or USO
8	13.1	39.2	469	11.5	35.4	417	Laparoscopic	Cystectomy or USO
8	12.9	37.5	420	12.2	36.8	404	Laparoscopic	Cystectomy or USO
8	13.7	42.8	496	13	40.8	466	Laparoscopic	Cystectomy or USO
8	14.4	42.2	492	13.2	39.8	451	Laparoscopic	Cystectomy or USO
8	12.6	37.1	441	10.6	31.4	365	Laparoscopic	Cystectomy or USO
8	13.2	40.3	448	12.4	38.5	426	Laparoscopic	Cystectomy or USO
8	12.5	36.9	423	12.4	36.9	424	Laparoscopic	Cystectomy or USO
8	13.1	37.8	414	12.9	38.4	412	Laparoscopic	Cystectomy or USO
8	14.5	41.8	466	12.4	37.4	408	Laparoscopic	Cystectomy or USO
8	14.4	43.5	464	13.6	42.1	447	Laparoscopic	Cystectomy or USO
8	11.9	37.3	429	11.4	35.5	406	Laparoscopic	Cystectomy or USO
8	12.5	37.2	401	12.1	37	397	Laparoscopic	Cystectomy or USO
9	13.3	38.3	419	12.6	36.8	400	Laparoscopic	Cystectomy or USO
9	12.9	38.4	425	12.3	37.2	403	Laparoscopic	Cystectomy or USO
10	12.7	37.3	424	11.5	34.3	382	Laparoscopic	Cystectomy or USO
10	13.5	41.4	437	12.3	37.5	392	Laparoscopic	Cystectomy or USO
10	12.2	35.3	394	11.7	34.6	382	Laparoscopic	Cystectomy or USO
10	11	32.8	366	7.5	23	254	Laparoscopic	Cystectomy or USO
10	12.6	39	409	10.8	33.6	349	Laparoscopic	Cystectomy or USO
10	11.9	36.1	387	10.6	32.5	349	Laparoscopic	Cystectomy or USO
10	12.3	37.2	416	11.7	35.1	388	Laparoscopic	Cystectomy or USO
10	11.6	35.5	430	10.2	31.6	382	Laparoscopic	Cystectomy or USO
10	14.3	41.7	459	12.5	37.3	408	Laparoscopic	Cystectomy or USO
10	13.2	39.5	425	11.9	36	381	Laparoscopic	Cystectomy or USO
10	12.7	37.3	403	12.2	36.8	398	Laparoscopic	Cystectomy or USO
10	12.9	38.2	460	11	33.5	396	Laparoscopic	Cystectomy or USO
10	13.5	39.5	455	13.4	40.3	458	Laparoscopic	Cystectomy or USO
10	12.7	36.8	439	11.5	34.7	404	Laparoscopic	Cystectomy or USO
10	12.8	38.1	429	12	36.1	404	Laparoscopic	Cystectomy or USO
10	13.2	40.3	481	12.5	37.9	453	Laparoscopic	Cystectomy or USO
10	13	38.2	412	12.3	36.8	391	Laparoscopic	Cystectomy or USO
10	13.4	40.1	438	12.2	37.6	399	Laparoscopic	Cystectomy or USO
10	11.7	36	440	10.4	31.3	380	Laparoscopic	Cystectomy or USO
10	14	41.9	458	13.2	40.2	433	Laparoscopic	Cystectomy or USO
10	12.6	36.1	395	11.9	34.6	381	Laparoscopic	Cystectomy or USO
10	13	38.6	442	12.2	36.3	413	Laparoscopic	Cystectomy or USO
10	13.2	39.5	469	12.8	39.6	458	Laparoscopic	Cystectomy or USO
10	12.6	37.3	428	11.4	34.7	398	Laparoscopic	Cystectomy or USO
10	14.5	41.6	474	12.8	37.2	422	Laparoscopic	Cystectomy or USO
10	14	41.1	462	13	38.3	433	Laparoscopic	Cystectomy or USO
10	13.1	39.6	431	13	39.3	425	Laparoscopic	Cystectomy or USO
10	12.6	37.4	426	11.3	34.1	383	Laparoscopic	Cystectomy or USO
10	12	37.7	458	11.4	36.4	436	Laparoscopic	Cystectomy or USO
10	13.1	39	418	12.4	36.8	394	Laparoscopic	Cystectomy or USO
10	11.6	36.5	485	9.6	30.5	403	Laparoscopic	Cystectomy or USO
10	12.4	37.5	428	11.7	35.9	412	Laparoscopic	Cystectomy or USO
10	13.5	39.5	419	11.2	32.8	356	Laparoscopic	Cystectomy or USO
10	12.7	38.8	408	13	39.9	421	Laparoscopic	Cystectomy or USO
10	12.3	37.5	428	12.5	37.4	428	Laparoscopic	Cystectomy or USO
10	13.8	41.3	452	12.2	36.4	400	Laparoscopic	Cystectomy or USO
10	13	38.3	427	12.5	38	411	Laparoscopic	Cystectomy or USO
10	13.3	39.7	447	12.2	37.5	417	Laparoscopic	Cystectomy or USO
10	11.8	34.6	381	10.8	31.4	349	Laparoscopic	Cystectomy or USO
10	13.4	40	456	13	39	443	Laparoscopic	Cystectomy or USO
10	12.4	37.9	407	11.1	34.3	364	Laparoscopic	Cystectomy or USO
10	12.7	38.7	459	11.4	35.9	414	Laparoscopic	Cystectomy or USO
10	13.4	39.8	461	11.7	34.6	399	Laparoscopic	Cystectomy or USO
10	12.1	37.6	459	11	34.7	418	Laparoscopic	Cystectomy or USO
10	11.9	35.7	360	10.7	31.4	322	Laparoscopic	Cystectomy or USO
11	12	36.9	439	10.7	34	396	Laparoscopic	Cystectomy or USO
11	13.1	38.1	434	11.7	35.2	393	Laparoscopic	Cystectomy or USO
11	13.1	37.4	453	11.4	33.6	392	Laparoscopic	Cystectomy or USO
11	12.6	37.9	431	12.4	37.2	426	Laparoscopic	Cystectomy or USO
11	13.3	38.1	413	13	38.2	412	Laparoscopic	Cystectomy or USO
11	12	35.6	408	11.3	34	388	Laparoscopic	Cystectomy or USO
11	12.6	37.6	408	11.8	35	384	Laparoscopic	Cystectomy or USO
11	12.9	38.1	443	11.8	34.2	400	Laparoscopic	Cystectomy or USO
11	13	38.1	415	11.8	35.8	381	Laparoscopic	Cystectomy or USO
11	13.6	42.2	470	12.7	39.4	435	Laparoscopic	Cystectomy or USO
12	12.5	36.6	405	12.1	35.9	394	Laparoscopic	Cystectomy or USO
12	13.2	39.7	451	11.4	35.2	394	Laparoscopic	Cystectomy or USO
12	12.6	36.7	442	12.2	36.8	442	Laparoscopic	Cystectomy or USO
12	10.9	33.6	398	12.2	38.3	444	Laparoscopic	Cystectomy or USO
12	12.6	38.6	446	11.2	34.5	404	Laparoscopic	Cystectomy or USO
12	13.5	40.8	461	11.7	35.2	396	Laparoscopic	Cystectomy or USO
12	12.5	37.7	425	11.6	35.9	402	Laparoscopic	Cystectomy or USO
13	12	37.1	428	10.7	33.7	386	Laparoscopic	Cystectomy or USO
13	11.3	34.9	365	10.9	33.8	348	Laparoscopic	Cystectomy or USO
13	12.5	36.5	416	10.7	31.8	352	Laparoscopic	Cystectomy or USO
13	12.4	36.7	400	10.1	31	353	Laparoscopic	Cystectomy or USO
13	13.6	39.5	465	12.9	37.7	441	Laparoscopic	Cystectomy or USO
13	12.3	37.7	451	9.3	29.1	346	Laparoscopic	Cystectomy or USO
13	13.8	40.4	462	13	38.9	435	Laparoscopic	Cystectomy or USO
13	12.8	38.2	414	11.6	35.1	380	Laparoscopic	Cystectomy or USO
13	12.5	36	412	11.5	33.4	382	Laparoscopic	Cystectomy or USO
13	12.2	36.9	396	11.7	36.6	388	Laparoscopic	Cystectomy or USO
13	14	40.5	456	13.5	39.3	437	Laparoscopic	Cystectomy or USO
13	12.7	38.6	483	11.3	34.8	427	Laparoscopic	Cystectomy or USO
13	11.5	35.9	432	10.9	34.3	414	Laparoscopic	Cystectomy or USO
13	11.7	35.4	398	11.3	34.8	391	Laparoscopic	Cystectomy or USO
13	12.8	40.1	402	11	34	340	Laparoscopic	Cystectomy or USO
13	11.9	35.7	426	11.8	36.2	429	Laparoscopic	Cystectomy or USO
14	15	42.4	508	13.6	39.7	458	Laparoscopic	Cystectomy or USO
14	13	37.4	419	12.1	35.2	395	Laparoscopic	Cystectomy or USO
14	13.1	40.5	456	11.6	35.4	397	Laparoscopic	Cystectomy or USO
15	12.1	36.9	407	10.5	32.7	359	Laparoscopic	Cystectomy or USO
15	11.9	36	397	10.4	32.2	348	Laparoscopic	Cystectomy or USO
15	12.6	38.1	436	10.9	33.5	382	Laparoscopic	Cystectomy or USO
15	12.6	37.9	406	12	36.9	387	Laparoscopic	Cystectomy or USO
15	12.7	37.8	415	12.7	37.9	410	Laparoscopic	Cystectomy or USO
15	12.2	38.1	421	12.2	37.7	420	Laparoscopic	Cystectomy or USO
15	11.8	34.6	395	10.7	31.1	354	Laparoscopic	Cystectomy or USO
15	12.6	37.8	452	11.4	34.8	417	Laparoscopic	Cystectomy or USO
15	13.3	39.6	483	11.5	34.5	417	Laparoscopic	Cystectomy or USO
15	12.7	39.8	499	10.6	33.2	415	Laparoscopic	Cystectomy or USO
15	12.6	38.3	402	10.8	33.4	357	Laparoscopic	Cystectomy or USO
16	14	41.2	500	11.2	33.2	407	Laparoscopic	Cystectomy or USO
16	12.7	38	433	12.4	37.3	426	Laparoscopic	Cystectomy or USO
16	11.6	37.2	427	11.4	36.2	415	Laparoscopic	Cystectomy or USO
16	14.3	43.2	482	12.3	38	420	Laparoscopic	Cystectomy or USO
16	12.5	37.5	427	12.1	35.8	401	Laparoscopic	Cystectomy or USO
16	13.3	38.1	428	12.7	36.7	410	Laparoscopic	Cystectomy or USO
16	10.8	33.4	429	9.4	29	369	Laparoscopic	Cystectomy or USO
16	15.7	47.4	523	13.4	40.4	440	Laparoscopic	Cystectomy or USO
17	13.7	41.4	441	12.4	37.1	397	Laparoscopic	Cystectomy or USO
17	12.3	38.5	447	11.3	36.4	417	Laparoscopic	Cystectomy or USO
18	11.5	35.9	402	10.7	32.5	371	Laparoscopic	Cystectomy or USO
19	13	37.8	423	10.9	32.5	356	Laparoscopic	Cystectomy or USO
19	11.8	35	390	10.6	32.3	357	Laparoscopic	Cystectomy or USO
19	13.3	39.7	423	12.4	36.5	389	Laparoscopic	Cystectomy or USO
20	11.5	34.5	394	10.3	31.1	359	Laparoscopic	Cystectomy or USO
20	13	39.5	412	12.4	37.3	391	Laparoscopic	Cystectomy or USO
20	12.2	36.5	392	11.1	32.9	352	Laparoscopic	Cystectomy or USO
20	13.1	38.4	401	12.1	36.4	374	Laparoscopic	Cystectomy or USO
20	15.4	44.2	457	12.8	38.2	390	Laparoscopic	Cystectomy or USO
20	12.4	36.4	392	11.4	33.7	356	Laparoscopic	Cystectomy or USO
20	13.7	40.7	463	12.2	37.2	411	Laparoscopic	Cystectomy or USO
20	9.4	30.1	392	9.2	29.1	374	Laparoscopic	Cystectomy or USO
20	13.7	40.4	441	13.2	40.3	431	Laparoscopic	Cystectomy or USO
20	9.3	28.7	386	8.7	27.5	364	Laparoscopic	Cystectomy or USO
20	12.9	37.2	425	11.8	34.8	391	Laparoscopic	Cystectomy or USO
20	12.3	36.9	427	12.5	36.6	423	Laparoscopic	Cystectomy or USO
20	11.9	35	394	11.3	33.1	370	Laparoscopic	Cystectomy or USO
20	12.6	36.5	422	11.7	34.7	399	Laparoscopic	Cystectomy or USO
20	13.9	40.7	442	11.8	35.5	386	Laparoscopic	Cystectomy or USO
20	13.2	39.3	454	12.1	36.4	420	Laparoscopic	Cystectomy or USO
20	13.5	37.7	416	12.4	36.3	393	Laparoscopic	Cystectomy or USO
20	13.2	40.5	466	11.9	37.5	429	Laparoscopic	Cystectomy or USO
20	13.5	41.3	430	12.9	39.2	408	Laparoscopic	Cystectomy or USO
20	12.5	37	427	11.7	35.5	408	Laparoscopic	Cystectomy or USO
20	11.5	33.9	406	11.5	35.4	409	Laparoscopic	Cystectomy or USO
20	14.1	42	446	13.3	40	417	Laparoscopic	Cystectomy or USO
20	12.5	39.6	457	11	35.1	398	Laparoscopic	Cystectomy or USO
21	12.6	38.1	435	10.9	33	373	Laparoscopic	Cystectomy or USO
21	13	38.2	418	12.9	38.2	411	Laparoscopic	Cystectomy or USO
21	12.6	37.2	421	12.3	36	414	Laparoscopic	Cystectomy or USO
22	14.1	42	458	13.4	38.7	430	Laparoscopic	Cystectomy or USO
22	11.4	35.3	443	11.2	34.9	438	Laparoscopic	Cystectomy or USO
22	11.5	36.2	420	10.3	32.9	378	Laparoscopic	Cystectomy or USO
22	10.7	33.2	381	9.8	30.1	342	Laparoscopic	Cystectomy or USO
22	14.4	43	476	14.2	42.7	473	Laparoscopic	Cystectomy or USO
22	11.4	34.3	407	10.2	30.4	361	Laparoscopic	Cystectomy or USO
22	12	36.1	467	11.1	33.6	434	Laparoscopic	Cystectomy or USO
22	13.4	40.6	459	12.2	37.7	420	Laparoscopic	Cystectomy or USO
22	12	37.5	473	11.5	36.5	450	Laparoscopic	Cystectomy or USO
23	12.6	38.8	404	12.8	39.4	414	Laparoscopic	Cystectomy or USO
23	12.1	36.3	407	11.3	33.6	374	Laparoscopic	Cystectomy or USO
23	13.2	39.7	439	10.1	30.7	331	Laparoscopic	Cystectomy or USO
23	13.2	37.8	443	12.6	36.1	417	Laparoscopic	Cystectomy or USO
23	11	34.2	427	10.5	32.6	404	Laparoscopic	Cystectomy or USO
23	14	40	431	12.4	38	399	Laparoscopic	Cystectomy or USO
23	14.4	42.9	477	13.2	40.1	437	Laparoscopic	Cystectomy or USO
23	13.6	40.2	439	12.9	38.3	411	Laparoscopic	Cystectomy or USO
23	15.9	45.3	537	15.1	43.7	510	Laparoscopic	Cystectomy or USO
23	12.9	38.7	426	11.9	34.9	392	Laparoscopic	Cystectomy or USO
23	13.6	41.1	466	13.2	39.9	450	Laparoscopic	Cystectomy or USO
23	11	32.8	346	10.9	32.6	345	Laparoscopic	Cystectomy or USO
23	12.3	37.6	401	9.4	29.7	317	Laparoscopic	Cystectomy or USO
24	12.9	39.4	459	12	36	431	Laparoscopic	Cystectomy or USO
25	10.9	33.6	416	10.7	33.4	407	Laparoscopic	Cystectomy or USO
25	14.3	41.6	456	12.7	37.8	416	Laparoscopic	Cystectomy or USO
25	13.4	39	427	13	38.4	423	Laparoscopic	Cystectomy or USO
25	13.5	39.5	437	14.2	40.6	455	Laparoscopic	Cystectomy or USO
25	13.2	39.4	418	12.4	37	390	Laparoscopic	Cystectomy or USO
25	13.6	40.5	451	11.9	35	393	Laparoscopic	Cystectomy or USO
25	13.1	38.4	426	12.7	38	418	Laparoscopic	Cystectomy or USO
25	12.9	39.6	430	11.9	35.9	393	Laparoscopic	Cystectomy or USO
26	12.1	36.5	424	11	33.7	393	Laparoscopic	Cystectomy or USO
26	12	37	554	10.4	32.6	491	Laparoscopic	Cystectomy or USO
26	12.8	37.7	450	12.1	35.3	423	Laparoscopic	Cystectomy or USO
27	13.6	41.5	462	11.9	36.5	399	Laparoscopic	Cystectomy or USO
28	13.6	41	450	12	37.5	401	Laparoscopic	Cystectomy or USO
28	12.3	36.6	420	11.8	35.5	412	Laparoscopic	Cystectomy or USO
28	13.9	40	450	13.1	38.5	430	Laparoscopic	Cystectomy or USO
28	13.3	41	450	12.8	39.9	437	Laparoscopic	Cystectomy or USO
29	12.2	36.6	387	11.5	35.7	367	Laparoscopic	Cystectomy or USO
30	11.8	36.3	385	11.3	35.2	371	Laparoscopic	Cystectomy or USO
30	11.8	35.4	350	11.1	34.4	334	Laparoscopic	Cystectomy or USO
30	12.8	38.5	420	11.5	34.4	378	Laparoscopic	Cystectomy or USO
30	13.4	41.1	431	12.6	38.6	410	Laparoscopic	Cystectomy or USO
30	12.7	38	422	11.2	33.9	366	Laparoscopic	Cystectomy or USO
30	12.2	36.8	411	11.1	33.9	377	Laparoscopic	Cystectomy or USO
30	14.1	39.4	450	12.1	34.6	393	Laparoscopic	Cystectomy or USO
30	12.2	34.8	412	11.7	35.3	399	Laparoscopic	Cystectomy or USO
31	13.6	41.5	477	12	36.6	417	Laparoscopic	Cystectomy or USO
31	12.8	38.8	409	11.9	36.7	382	Laparoscopic	Cystectomy or USO
32	14.7	41.8	441	12.6	37.2	385	Laparoscopic	Cystectomy or USO
32	11.2	34.8	407	10.6	32.3	379	Laparoscopic	Cystectomy or USO
33	14.4	41.6	425	11.9	35.1	356	Laparoscopic	Cystectomy or USO
33	12.5	37.1	434	12.4	35.8	417	Laparoscopic	Cystectomy or USO
35	13.8	40.5	455	12.8	38.7	427	Laparoscopic	Cystectomy or USO
35	13.3	40.1	441	12.4	37.8	408	Laparoscopic	Cystectomy or USO
35	11.8	35.4	389	10.9	33.1	364	Laparoscopic	Cystectomy or USO
37	12.1	35.7	385	11.7	33.7	367	Laparoscopic	Cystectomy or USO
38	12.5	37.2	429	10.9	32.3	368	Laparoscopic	Cystectomy or USO
40	13.1	39	409	12.5	36.9	384	Laparoscopic	Cystectomy or USO
40	11.9	35.2	389	11.3	34.2	376	Laparoscopic	Cystectomy or USO
40	14.1	42.7	508	12.6	38.3	453	Laparoscopic	Cystectomy or USO
40	12.6	37.1	426	11.6	34.3	387	Laparoscopic	Cystectomy or USO
40	14.6	42.7	461	12.6	37.4	406	Laparoscopic	Cystectomy or USO
40	13.5	39.6	478	11.8	35.5	426	Laparoscopic	Cystectomy or USO
44	14.2	43.6	485	13.3	40.1	453	Laparoscopic	Cystectomy or USO
45	12.2	36.6	395	11.5	34.9	371	Laparoscopic	Cystectomy or USO
46	13	38.3	436	12.6	38.8	436	Laparoscopic	Cystectomy or USO
46	12.8	38.8	438	11.3	35.1	396	Laparoscopic	Cystectomy or USO
46	11.8	35.7	384	10.9	31.8	348	Laparoscopic	Cystectomy or USO
46	12.5	38.3	425	10.5	32.4	359	Laparoscopic	Cystectomy or USO
50	12.7	39.4	405	13.2	41.7	423	Laparoscopic	Cystectomy or USO
50	11.6	33.8	378	10.6	30.8	346	Laparoscopic	Cystectomy or USO
50	13	38.4	463	10.5	31.3	377	Laparoscopic	Cystectomy or USO
50	11.3	34.2	371	11.8	35.8	383	Laparoscopic	Cystectomy or USO
50	10.8	34	460	9.7	30.9	417	Laparoscopic	Cystectomy or USO
50	13.5	40.3	423	12.5	37.9	386	Laparoscopic	Cystectomy or USO
50	12.5	37.3	409	11.7	35.1	383	Laparoscopic	Cystectomy or USO
50	13.5	39.5	439	12.3	36.2	397	Laparoscopic	Cystectomy or USO
50	13.6	40.2	448	11.7	34.9	386	Laparoscopic	Cystectomy or USO
50	12.3	37.2	415	12.2	36.7	410	Laparoscopic	Cystectomy or USO
50	14.6	42.5	495	13.6	39	458	Laparoscopic	Cystectomy or USO
50	12.4	36.5	396	11.3	32.9	358	Laparoscopic	Cystectomy or USO
50	12.5	38	440	12.6	38.7	453	Laparoscopic	Cystectomy or USO
50	13.6	39.4	425	12.1	35.3	388	Laparoscopic	Cystectomy or USO
50	11	34.3	427	10.5	32.2	411	Laparoscopic	Cystectomy or USO
50	12.9	39	460	10.7	33.1	385	Laparoscopic	Cystectomy or USO
50	13.2	37.6	439	11.7	33.8	390	Laparoscopic	Cystectomy or USO
50	12.9	39.3	436	11.2	33.5	374	Laparoscopic	Cystectomy or USO
50	13.4	39.4	438	13.1	38.6	429	Laparoscopic	Cystectomy or USO
50	12.2	37.6	423	10.7	33.3	372	Laparoscopic	Cystectomy or USO
50	12.5	37.4	400	10.1	30.4	323	Laparoscopic	Cystectomy or USO
50	13.5	40.6	432	13.1	39.1	415	Laparoscopic	Cystectomy or USO
51	13.2	38.8	412	12.8	38.9	413	Laparoscopic	Cystectomy or USO
51	12.9	36.7	430	12.9	38.2	448	Laparoscopic	Cystectomy or USO
51	11.3	34.1	410	10.7	32.6	390	Laparoscopic	Cystectomy or USO
52	11.8	34.7	395	11.9	35.7	401	Laparoscopic	Cystectomy or USO
52	12.2	37.3	432	12.6	38.7	447	Laparoscopic	Cystectomy or USO
52	12.7	37.2	425	11.5	34.9	390	Laparoscopic	Cystectomy or USO
52	13.7	39.2	441	12.8	38.2	411	Laparoscopic	Cystectomy or USO
52	14.5	43.4	521	13.7	40.8	481	Laparoscopic	Cystectomy or USO
52	12.1	37.5	435	11.7	34.5	407	Laparoscopic	Cystectomy or USO
53	13	39	439	12.3	37.3	420	Laparoscopic	Cystectomy or USO
53	13.3	39.9	438	11.5	35.6	384	Laparoscopic	Cystectomy or USO
53	13.9	41.4	438	12.6	37.9	394	Laparoscopic	Cystectomy or USO
53	10.7	33	395	9.7	30.2	363	Laparoscopic	Cystectomy or USO
53	14.2	42.2	476	12.3	36.1	413	Laparoscopic	Cystectomy or USO
53	13.1	38.2	400	11.4	33.6	352	Laparoscopic	Cystectomy or USO
54	11.5	35	468	10.2	31.9	421	Laparoscopic	Cystectomy or USO
54	12.8	38.3	411	13.2	39.6	429	Laparoscopic	Cystectomy or USO
55	13.1	40.2	481	11.8	36.1	428	Laparoscopic	Cystectomy or USO
55	13.7	39	461	11.2	33	381	Laparoscopic	Cystectomy or USO
55	13.8	40.5	450	12.5	36.5	400	Laparoscopic	Cystectomy or USO
55	11.4	35.8	423	11	34.7	408	Laparoscopic	Cystectomy or USO
55	12.8	38.2	428	12	36.9	410	Laparoscopic	Cystectomy or USO
55	13.2	39.8	475	11.5	34.7	411	Laparoscopic	Cystectomy or USO
55	14	41.3	482	13.1	39	450	Laparoscopic	Cystectomy or USO
55	12.5	37.3	401	10.8	32.2	347	Laparoscopic	Cystectomy or USO
55	13.4	39.3	453	13.6	40.5	457	Laparoscopic	Cystectomy or USO
56	12.2	36.1	389	11.3	33.7	361	Laparoscopic	Cystectomy or USO
56	14.2	41.2	471	13	37.4	427	Laparoscopic	Cystectomy or USO
56	13.2	39.7	421	11.9	35.1	378	Laparoscopic	Cystectomy or USO
56	12.1	36.2	401	11.8	35.5	396	Laparoscopic	Cystectomy or USO
56	13.9	41.6	509	12.3	36.7	448	Laparoscopic	Cystectomy or USO
59	12.9	38.1	425	12	35.9	402	Laparoscopic	Cystectomy or USO
60	10.8	32.8	380	9.6	29.5	338	Laparoscopic	Cystectomy or USO
60	12.9	37.6	448	12	35.3	413	Laparoscopic	Cystectomy or USO
60	11.6	34.9	415	11.3	34.1	407	Laparoscopic	Cystectomy or USO
60	11	33.7	387	11	33.6	383	Laparoscopic	Cystectomy or USO
61	12.4	38	416	12.2	37.2	405	Laparoscopic	Cystectomy or USO
61	12.1	33.7	382	10.6	29.9	337	Laparoscopic	Cystectomy or USO
62	12.3	36.8	426	12.3	36.5	427	Laparoscopic	Cystectomy or USO
62	12.6	37.6	408	12.3	37.6	405	Laparoscopic	Cystectomy or USO
65	12.6	38.4	438	10.3	31.7	359	Laparoscopic	Cystectomy or USO
65	13.6	40.5	445	12	36	395	Laparoscopic	Cystectomy or USO
65	14.2	42.4	484	13.6	40.8	464	Laparoscopic	Cystectomy or USO
65	13.9	41.3	447	12.6	37.1	403	Laparoscopic	Cystectomy or USO
66	12.2	36.6	435	11	33.1	391	Laparoscopic	Cystectomy or USO
69	12.4	37.9	429	11.3	34.8	395	Laparoscopic	Cystectomy or USO
70	11.1	33.7	426	10.5	32.4	408	Laparoscopic	Cystectomy or USO
71	12.5	36.6	416	12	34.9	393	Laparoscopic	Cystectomy or USO
71	13.2	39.7	437	12.8	38.4	424	Laparoscopic	Cystectomy or USO
72	13.2	39.5	466	10.8	33.3	391	Laparoscopic	Cystectomy or USO
72	14.9	43.6	476	12.5	36.2	398	Laparoscopic	Cystectomy or USO
73	12.7	37.2	425	13.2	38.7	437	Laparoscopic	Cystectomy or USO
75	12.4	38.4	440	12.1	37.2	423	Laparoscopic	Cystectomy or USO
75	12.9	38.3	426	12	37	403	Laparoscopic	Cystectomy or USO
75	14.2	40.5	462	12.2	35.4	400	Laparoscopic	Cystectomy or USO
76	12.6	38.4	419	12.2	37.4	406	Laparoscopic	Cystectomy or USO
77	12.8	39.4	443	12.3	37.1	416	Laparoscopic	Cystectomy or USO
79	10.9	33.6	383	10.3	32.1	360	Laparoscopic	Cystectomy or USO
82	12.3	36.9	482	11	33.5	431	Laparoscopic	Cystectomy or USO
82	13.8	39.3	462	12.1	35.5	412	Laparoscopic	Cystectomy or USO
83	12.1	36.3	376	11.2	34	349	Laparoscopic	Cystectomy or USO
83	13.3	39.2	441	12.2	36.9	407	Laparoscopic	Cystectomy or USO
85	12.1	38.4	545	11.3	36.9	519	Laparoscopic	Cystectomy or USO
85	12.5	37.7	429	11.4	34	385	Laparoscopic	Cystectomy or USO
85	13.7	41.9	486	12.5	39.5	454	Laparoscopic	Cystectomy or USO
90	13	38.5	414	11.7	35.8	375	Laparoscopic	Cystectomy or USO
90	12.9	37.9	429	11.7	35.1	388	Laparoscopic	Cystectomy or USO
95	12.6	37.9	404	12	36.6	387	Laparoscopic	Cystectomy or USO
98	13.6	40.6	488	12.7	38.7	459	Laparoscopic	Cystectomy or USO
99	11.3	36.2	448	10.8	34.6	421	Laparoscopic	Cystectomy or USO
99	12.4	37.3	423	11.8	35	401	Laparoscopic	Cystectomy or USO
100	11.9	36.4	426	10.8	33.1	382	Laparoscopic	Cystectomy or USO
100	12.9	39.1	434	11.5	34.8	385	Laparoscopic	Cystectomy or USO
100	12.5	37.6	454	12.5	37.7	449	Laparoscopic	Cystectomy or USO
100	11.8	35.5	397	11.1	34.4	380	Laparoscopic	Cystectomy or USO
100	13.1	38.2	426	11.7	34.9	376	Laparoscopic	Cystectomy or USO
100	12.8	37.7	370	12.5	38.2	367	Laparoscopic	Cystectomy or USO
100	12.6	37.5	428	12.3	37.3	422	Laparoscopic	Cystectomy or USO
100	14.2	40.6	433	13.3	38.8	406	Laparoscopic	Cystectomy or USO
100	11.9	34.8	367	11.6	34.1	356	Laparoscopic	Cystectomy or USO
100	11.3	33.1	366	10.2	30.2	337	Laparoscopic	Cystectomy or USO
100	11.9	36.4	428	11.1	33.5	406	Laparoscopic	Cystectomy or USO
100	12.5	36.9	464	11.6	34.6	427	Laparoscopic	Cystectomy or USO
100	11.8	36	373	10.1	30.8	321	Laparoscopic	Cystectomy or USO
101	12.9	39.9	449	12.2	37.8	423	Laparoscopic	Cystectomy or USO
101	14.1	41	456	13.1	39.5	427	Laparoscopic	Cystectomy or USO
101	12.7	38	442	11.2	33.5	389	Laparoscopic	Cystectomy or USO
101	12.3	36.7	399	11.6	34.1	372	Laparoscopic	Cystectomy or USO
101	12	37.2	422	11	34.4	378	Laparoscopic	Cystectomy or USO
102	12.2	36.3	440	12.2	37.4	447	Laparoscopic	Cystectomy or USO
102	12.5	37.2	419	12	36.1	401	Laparoscopic	Cystectomy or USO
102	11.9	36.8	423	11.3	34.9	396	Laparoscopic	Cystectomy or USO
102	11.7	36.2	418	11.2	34.9	397	Laparoscopic	Cystectomy or USO
102	13.1	39.9	450	12.5	39.6	439	Laparoscopic	Cystectomy or USO
103	12.6	37.4	444	11	33	388	Laparoscopic	Cystectomy or USO
103	11.2	34.7	411	10	31.6	370	Laparoscopic	Cystectomy or USO
103	11.8	36.2	475	11.3	35.1	454	Laparoscopic	Cystectomy or USO
103	10.8	33.3	404	10.9	33.8	402	Laparoscopic	Cystectomy or USO
103	12.2	36.3	408	11.6	35.2	388	Laparoscopic	Cystectomy or USO
103	11.8	36.8	450	10.6	33.6	404	Laparoscopic	Cystectomy or USO
103	12.2	36.5	385	11.7	35.5	364	Laparoscopic	Cystectomy or USO
103	12.4	35.2	408	10.4	29.8	345	Laparoscopic	Cystectomy or USO
103	11.9	36.8	402	10.6	32.9	366	Laparoscopic	Cystectomy or USO
103	12.2	36.9	403	10.8	32.6	360	Laparoscopic	Cystectomy or USO
104	14.4	41	448	12.9	38.1	406	Laparoscopic	Cystectomy or USO
104	12.1	36.6	430	10.8	32.9	387	Laparoscopic	Cystectomy or USO
105	13	39.5	438	12.1	36.3	408	Laparoscopic	Cystectomy or USO
105	14.6	43.5	501	12.8	38.7	442	Laparoscopic	Cystectomy or USO
106	13.6	39.2	468	11.7	33.7	395	Laparoscopic	Cystectomy or USO
108	14.2	42	463	12.5	37.2	412	Laparoscopic	Cystectomy or USO
108	11.3	34	385	11.1	32.8	374	Laparoscopic	Cystectomy or USO
110	12.8	38.5	439	11.8	35.7	405	Laparoscopic	Cystectomy or USO
111	14.9	43.1	456	11.3	32.8	338	Laparoscopic	Cystectomy or USO
112	12.8	38.3	422	11.2	33.9	374	Laparoscopic	Cystectomy or USO
115	12.5	36.9	391	11.2	32.8	346	Laparoscopic	Cystectomy or USO
116	12.2	36.6	432	11.4	33.5	399	Laparoscopic	Cystectomy or USO
120	12.8	38.5	424	12.7	38	417	Laparoscopic	Cystectomy or USO
120	14	41	466	11.7	35.8	394	Laparoscopic	Cystectomy or USO
120	14	40.4	449	12.8	38.1	415	Laparoscopic	Cystectomy or USO
126	9.9	30.9	383	10.4	31.6	382	Laparoscopic	Cystectomy or USO
127	12.9	39.5	420	11.6	35.5	377	Laparoscopic	Cystectomy or USO
129	11.3	35.9	475	10.9	35.2	470	Laparoscopic	Cystectomy or USO
130	10.6	34.1	410	10	31.6	381	Laparoscopic	Cystectomy or USO
130	12.5	37.7	432	10.5	32.3	365	Laparoscopic	Cystectomy or USO
132	13.2	38.8	438	11.5	34.4	391	Laparoscopic	Cystectomy or USO
133	13.4	40.7	546	12.2	37.2	497	Laparoscopic	Cystectomy or USO
139	13.2	40.4	537	11.5	35.3	468	Laparoscopic	Cystectomy or USO
148	12.9	38.4	428	11.7	34.6	388	Laparoscopic	Cystectomy or USO
150	13.6	40.5	449	12.9	39.4	430	Laparoscopic	Cystectomy or USO
150	13.1	39.7	448	11.2	34.5	388	Laparoscopic	Cystectomy or USO
150	13.4	38.9	421	11.6	34.1	372	Laparoscopic	Cystectomy or USO
150	13.2	38.6	447	11.4	33.8	395	Laparoscopic	Cystectomy or USO
150	13.7	41.1	470	12	36.4	421	Laparoscopic	Cystectomy or USO
150	13.7	40.8	464	10.8	33.3	375	Laparoscopic	Cystectomy or USO
150	13.9	42.3	484	13.9	41.5	479	Laparoscopic	Cystectomy or USO
152	10.8	33.1	381	9	27.2	307	Laparoscopic	Cystectomy or USO
152	12.1	37.5	470	10.5	32.2	408	Laparoscopic	Cystectomy or USO
152	13.9	42.5	450	12.7	39.7	418	Laparoscopic	Cystectomy or USO
153	12.9	38.5	416	11.5	34.9	373	Laparoscopic	Cystectomy or USO
154	12.6	36.4	424	11.8	34.7	403	Laparoscopic	Cystectomy or USO
155	11.3	34	370	11	31.8	358	Laparoscopic	Cystectomy or USO
155	10.6	34.6	463	10.4	34.8	456	Laparoscopic	Cystectomy or USO
156	11.8	35.1	393	10.9	32.2	363	Laparoscopic	Cystectomy or USO
157	11.4	35.4	387	11.6	36.6	396	Laparoscopic	Cystectomy or USO
157	14.7	42.4	491	13.6	39.7	459	Laparoscopic	Cystectomy or USO
160	13.8	40.6	456	11.9	35.7	393	Laparoscopic	Cystectomy or USO
161	11.4	35.1	410	10.8	33.3	389	Laparoscopic	Cystectomy or USO
172	10.2	32.3	410	10.1	32	403	Laparoscopic	Cystectomy or USO
175	13	40.1	493	11.6	36.2	442	Laparoscopic	Cystectomy or USO
177	13	38.9	421	13.2	39.6	429	Laparoscopic	Cystectomy or USO
180	11.9	36.2	432	11.2	34.9	412	Laparoscopic	Cystectomy or USO
180	14.3	41.8	458	12.9	38.1	406	Laparoscopic	Cystectomy or USO
180	13.1	39.2	449	12.9	39	444	Laparoscopic	Cystectomy or USO
181	10.1	31	353	10.5	32.7	376	Laparoscopic	Cystectomy or USO
193	12.3	38.1	409	11.3	34.6	372	Laparoscopic	Cystectomy or USO
200	13.4	39.7	448	12.6	38.1	422	Laparoscopic	Cystectomy or USO
200	12.3	36.5	387	11.1	34	354	Laparoscopic	Cystectomy or USO
200	13.7	40.4	449	12.5	37.1	414	Laparoscopic	Cystectomy or USO
200	13.4	40	461	11.5	34.5	401	Laparoscopic	Cystectomy or USO
200	12.4	36	425	10.1	30.1	347	Laparoscopic	Cystectomy or USO
200	12.3	37.9	425	10.8	32.7	366	Laparoscopic	Cystectomy or USO
200	13.2	39.5	432	12.8	39.5	418	Laparoscopic	Cystectomy or USO
200	13.4	40	462	12.6	38.1	423	Laparoscopic	Cystectomy or USO
200	13.5	38.6	415	11.9	34	362	Laparoscopic	Cystectomy or USO
200	13.4	38.4	419	12.3	35.4	384	Laparoscopic	Cystectomy or USO
200	12.6	37.6	416	12	35.4	396	Laparoscopic	Cystectomy or USO
200	13.3	39.1	444	12.2	36	408	Laparoscopic	Cystectomy or USO
200	13	41.1	487	10.8	34.5	412	Laparoscopic	Cystectomy or USO
201	10.8	33.4	441	10.6	32.6	430	Laparoscopic	Cystectomy or USO
201	12.3	36.6	398	12	35.8	387	Laparoscopic	Cystectomy or USO
201	10.4	33	409	10.4	33.6	414	Laparoscopic	Cystectomy or USO
202	11.4	34.8	390	10.6	32.7	364	Laparoscopic	Cystectomy or USO
202	13.3	38.9	462	11.9	34.9	419	Laparoscopic	Cystectomy or USO
202	11.7	34.2	424	10.9	33.3	407	Laparoscopic	Cystectomy or USO
202	11.7	37.4	447	9.8	31.9	374	Laparoscopic	Cystectomy or USO
203	13.8	41.1	437	12.3	36.6	392	Laparoscopic	Cystectomy or USO
205	13.4	40.8	469	12.8	38.8	441	Laparoscopic	Cystectomy or USO
205	12.6	36.5	407	11.5	33.4	366	Laparoscopic	Cystectomy or USO
205	12.3	36.3	419	12.6	37.4	439	Laparoscopic	Cystectomy or USO
206	13.1	38.3	448	12.3	36.9	426	Laparoscopic	Cystectomy or USO
206	13.8	39.8	442	12	35.5	380	Laparoscopic	Cystectomy or USO
207	13.9	41.6	473	11.7	35.8	405	Laparoscopic	Cystectomy or USO
208	12.6	40	517	12.1	39.4	499	Laparoscopic	Cystectomy or USO
209	10.1	32	396	9.7	31.3	375	Laparoscopic	Cystectomy or USO
210	13.2	39.6	456	12.1	37	422	Laparoscopic	Cystectomy or USO
212	13.5	40.1	447	11.7	35.6	395	Laparoscopic	Cystectomy or USO
220	13.8	40.2	443	12.9	37	411	Laparoscopic	Cystectomy or USO
224	13	40.1	421	11.7	35.7	378	Laparoscopic	Cystectomy or USO
228	11.5	34.5	407	9.8	30.6	356	Laparoscopic	Cystectomy or USO
231	11	34.6	454	9.8	31.4	398	Laparoscopic	Cystectomy or USO
240	11.6	37.1	421	10.6	34.3	385	Laparoscopic	Cystectomy or USO
250	12.6	37.1	428	11.3	33.4	385	Laparoscopic	Cystectomy or USO
250	12.5	35.4	416	9.8	28.2	321	Laparoscopic	Cystectomy or USO
250	13.5	39.6	407	12	35.6	367	Laparoscopic	Cystectomy or USO
251	13.3	39.3	467	12.3	36.6	435	Laparoscopic	Cystectomy or USO
252	14.1	40.9	463	12.7	38.3	428	Laparoscopic	Cystectomy or USO
252	12.7	38	431	11.5	34.5	394	Laparoscopic	Cystectomy or USO
258	14.6	44.8	491	11.8	35.9	387	Laparoscopic	Cystectomy or USO
261	14.6	43.8	490	12.7	38	431	Laparoscopic	Cystectomy or USO
268	12.3	37.5	434	10	30.2	350	Laparoscopic	Cystectomy or USO
272	12.4	35.7	395	11.6	34.2	381	Laparoscopic	Cystectomy or USO
275	12.6	36.6	435	11.5	33.4	391	Laparoscopic	Cystectomy or USO
282	13.2	39.6	432	11.7	35.1	379	Laparoscopic	Cystectomy or USO
285	13	39.5	449	11	34	380	Laparoscopic	Cystectomy or USO
286	12.2	36.8	427	11.1	33.8	392	Laparoscopic	Cystectomy or USO
290	13.6	40.1	463	12.3	36.7	429	Laparoscopic	Cystectomy or USO
300	12.3	36.9	462	11.1	33.8	420	Laparoscopic	Cystectomy or USO
300	11.8	33.8	382	10.8	30.8	343	Laparoscopic	Cystectomy or USO
300	13.6	40.5	457	11.6	35.1	396	Laparoscopic	Cystectomy or USO
300	11.4	35.6	450	10.9	34.7	432	Laparoscopic	Cystectomy or USO
301	11.9	37.1	399	12.1	38	406	Laparoscopic	Cystectomy or USO
307	14	41.7	466	12.5	38.3	419	Laparoscopic	Cystectomy or USO
318	14.9	43.5	500	12.2	36.8	413	Laparoscopic	Cystectomy or USO
340	12.5	37.1	415	11.5	34	381	Laparoscopic	Cystectomy or USO
357	11.8	35.8	384	11.1	33.5	362	Laparoscopic	Cystectomy or USO
402	12.1	37.8	442	10.3	32.1	370	Laparoscopic	Cystectomy or USO
450	12.9	38.3	415	12.6	36.6	400	Laparoscopic	Cystectomy or USO
455	12.3	36.4	411	9.7	28.6	318	Laparoscopic	Cystectomy or USO
460	13.5	38.7	414	11	32.6	348	Laparoscopic	Cystectomy or USO
470	10.1	31.8	377	9.8	31.4	366	Laparoscopic	Cystectomy or USO
475	13.2	39.2	438	11.1	33.8	373	Laparoscopic	Cystectomy or USO
600	11.6	36	438	10	31.2	377	Laparoscopic	Cystectomy or USO
633	13.8	40.1	443	10	29.9	325	Laparoscopic	Cystectomy or USO
766	13.7	40.5	451	9.5	28.4	310	Laparoscopic	Cystectomy or USO
3	11.8	35.8	415	10.2	30.8	361	Laparoscopic	Hysterectomy
5	12.8	39.7	445	11.4	36	393	Laparoscopic	Hysterectomy
7	13.9	42.3	482	12.6	38.1	435	Laparoscopic	Hysterectomy
9	13.2	39.9	467	10.4	31.9	367	Laparoscopic	Hysterectomy
10	12.8	39.2	439	11.1	34.5	385	Laparoscopic	Hysterectomy
10	12.3	39.5	456	12	37.8	441	Laparoscopic	Hysterectomy
10	12.6	37.6	436	11.1	34.5	391	Laparoscopic	Hysterectomy
11	13.2	39	430	13.1	38.9	435	Laparoscopic	Hysterectomy
20	13	38.1	430	11.9	34.9	388	Laparoscopic	Hysterectomy
20	15.2	45.1	508	12.8	39	436	Laparoscopic	Hysterectomy
22	13.5	40	445	11.8	35.1	388	Laparoscopic	Hysterectomy
22	12.6	37.5	475	10.5	33	406	Laparoscopic	Hysterectomy
31	12.9	39	433	12.4	38.2	416	Laparoscopic	Hysterectomy
35	13.2	39.1	481	12.3	37.3	440	Laparoscopic	Hysterectomy
40	12.8	38.1	446	11.2	34.5	399	Laparoscopic	Hysterectomy
46	12.5	36.2	379	12.3	35.7	367	Laparoscopic	Hysterectomy
48	12.8	39	438	12.3	37.3	425	Laparoscopic	Hysterectomy
50	12.3	37.8	437	11	34.9	397	Laparoscopic	Hysterectomy
50	14.1	43.1	488	12.4	37.8	432	Laparoscopic	Hysterectomy
50	12.3	37.9	412	10.3	32	344	Laparoscopic	Hysterectomy
50	14	42.4	467	11.3	34	378	Laparoscopic	Hysterectomy
50	13.4	40.8	466	12.9	39.6	440	Laparoscopic	Hysterectomy
50	13.8	42.6	520	12.2	37.8	456	Laparoscopic	Hysterectomy
51	12.7	39.3	418	10.6	33.3	350	Laparoscopic	Hysterectomy
52	12.7	38.8	391	11.6	35.7	351	Laparoscopic	Hysterectomy
53	13.5	40.9	474	11.8	35.8	413	Laparoscopic	Hysterectomy
53	13.7	40.4	463	12	35.7	406	Laparoscopic	Hysterectomy
55	10.9	34.2	379	10.5	32.9	366	Laparoscopic	Hysterectomy
57	12.6	39.3	419	12.1	38	397	Laparoscopic	Hysterectomy
65	10.2	31.2	348	9.2	27.9	313	Laparoscopic	Hysterectomy
65	11.8	36.1	404	12.2	37.4	416	Laparoscopic	Hysterectomy
71	12.1	36.5	394	11.8	35.9	385	Laparoscopic	Hysterectomy
75	13.6	41.6	458	11.8	36.6	393	Laparoscopic	Hysterectomy
75	12.6	39	511	12.4	39.6	508	Laparoscopic	Hysterectomy
75	12.8	39.9	459	10.1	31.2	359	Laparoscopic	Hysterectomy
75	13.2	44	620	12.4	40.6	570	Laparoscopic	Hysterectomy
78	12.9	39	424	11.4	34.4	374	Laparoscopic	Hysterectomy
82	14.2	41.6	457	13	38.3	421	Laparoscopic	Hysterectomy
90	10	29.8	361	9	27.5	326	Laparoscopic	Hysterectomy
90	11.8	35.8	413	9.9	30.1	345	Laparoscopic	Hysterectomy
100	13	38.8	452	11.7	36.9	414	Laparoscopic	Hysterectomy
100	12.7	37	412	13.1	38.4	422	Laparoscopic	Hysterectomy
100	13.2	40.7	493	11.4	35.5	423	Laparoscopic	Hysterectomy
100	14.3	40.6	474	12.9	38.5	435	Laparoscopic	Hysterectomy
100	13.7	40.4	483	9.1	26.9	319	Laparoscopic	Hysterectomy
100	14	41.8	467	12.6	37.2	416	Laparoscopic	Hysterectomy
102	14	40.1	445	12.3	36.4	398	Laparoscopic	Hysterectomy
102	13.7	39.9	402	13.1	39.9	393	Laparoscopic	Hysterectomy
103	13.8	41.6	472	12.3	36.6	420	Laparoscopic	Hysterectomy
104	12.7	38.6	429	11.6	35.2	386	Laparoscopic	Hysterectomy
104	12.9	39.8	500	11.9	37.3	458	Laparoscopic	Hysterectomy
107	12.2	39.2	481	10.1	32.9	397	Laparoscopic	Hysterectomy
108	12.3	37.5	414	11.5	35.7	385	Laparoscopic	Hysterectomy
110	11.2	34.2	399	11.2	34.3	393	Laparoscopic	Hysterectomy
115	12.6	39.9	504	11	36.3	444	Laparoscopic	Hysterectomy
118	14.3	41.1	454	11.2	33.3	366	Laparoscopic	Hysterectomy
120	11.1	33.7	394	10.6	32.3	372	Laparoscopic	Hysterectomy
121	14.5	42.9	455	11.9	36.3	381	Laparoscopic	Hysterectomy
130	12.4	37.7	476	11.4	34.2	431	Laparoscopic	Hysterectomy
143	13.2	39.8	452	11.4	35.1	392	Laparoscopic	Hysterectomy
148	12.8	38.3	447	11.3	35.6	399	Laparoscopic	Hysterectomy
150	11.7	37.2	436	10.4	33	387	Laparoscopic	Hysterectomy
151	12.2	36.6	399	10.2	31	336	Laparoscopic	Hysterectomy
153	11.2	33.9	383	10.8	32.3	359	Laparoscopic	Hysterectomy
155	12.7	38.4	430	12.7	38.5	428	Laparoscopic	Hysterectomy
155	12.6	37.4	390	11.1	34.2	344	Laparoscopic	Hysterectomy
156	14	40.1	413	11.9	35.6	357	Laparoscopic	Hysterectomy
157	12.3	37.7	376	11.6	35.7	349	Laparoscopic	Hysterectomy
157	11.3	35.3	421	11.5	36	425	Laparoscopic	Hysterectomy
158	14.3	41.8	463	12.7	36.6	405	Laparoscopic	Hysterectomy
167	12.8	35.6	431	10.8	31	368	Laparoscopic	Hysterectomy
177	13.2	38.6	450	12.3	35.7	419	Laparoscopic	Hysterectomy
179	14.2	41.3	464	11.6	34.1	380	Laparoscopic	Hysterectomy
181	11.8	35.2	374	11	32.6	350	Laparoscopic	Hysterectomy
187	12.3	40	538	11	36.2	474	Laparoscopic	Hysterectomy
200	12.4	39.3	509	10.4	33.2	421	Laparoscopic	Hysterectomy
200	13.2	38.6	440	10	29.9	336	Laparoscopic	Hysterectomy
201	14.9	43.2	516	13.1	39.3	463	Laparoscopic	Hysterectomy
201	11.2	33.8	385	10.7	32.8	368	Laparoscopic	Hysterectomy
202	13.5	40.5	436	11.7	36.1	381	Laparoscopic	Hysterectomy
205	13	39.3	434	11.4	34.8	379	Laparoscopic	Hysterectomy
207	11.9	36.5	442	11.6	35.4	435	Laparoscopic	Hysterectomy
212	13.6	42.4	512	11.6	36.9	437	Laparoscopic	Hysterectomy
227	12.6	37.1	412	11.1	33.5	370	Laparoscopic	Hysterectomy
233	12.7	36.8	419	11.7	34.3	382	Laparoscopic	Hysterectomy
240	12.9	39.3	462	11.4	35.2	410	Laparoscopic	Hysterectomy
248	12.3	38	454	10.8	34	403	Laparoscopic	Hysterectomy
250	13.1	38.3	434	11.1	33.2	376	Laparoscopic	Hysterectomy
250	13.6	40.8	436	11.6	35.6	384	Laparoscopic	Hysterectomy
250	14.1	43	530	11.9	36.8	447	Laparoscopic	Hysterectomy
250	13.7	40.4	474	11.4	33.9	382	Laparoscopic	Hysterectomy
251	14.5	45.5	559	12.9	41.4	506	Laparoscopic	Hysterectomy
259	12.9	38.7	373	12.5	37.7	370	Laparoscopic	Hysterectomy
265	11	35	404	9.2	30	335	Laparoscopic	Hysterectomy
275	15.3	44.1	467	13.3	39	418	Laparoscopic	Hysterectomy
278	11.9	35.6	421	9.5	28.8	337	Laparoscopic	Hysterectomy
295	13.5	41.6	478	11.7	37	417	Laparoscopic	Hysterectomy
300	13.6	40.5	438	11.5	34.6	370	Laparoscopic	Hysterectomy
303	13.1	40.7	453	11.4	35.6	393	Laparoscopic	Hysterectomy
324	14.3	43.8	488	13.4	40.8	458	Laparoscopic	Hysterectomy
350	13.3	39	449	11.7	35.4	401	Laparoscopic	Hysterectomy
350	11.5	35.8	407	9.7	30.2	340	Laparoscopic	Hysterectomy
356	12.3	38.1	475	10.9	33.7	416	Laparoscopic	Hysterectomy
358	12.6	38.4	440	11.2	34.4	393	Laparoscopic	Hysterectomy
358	14.2	40.5	455	11.3	32.6	366	Laparoscopic	Hysterectomy
385	12.5	38.7	444	11.3	34.8	391	Laparoscopic	Hysterectomy
400	12.6	38.6	467	11.2	35.3	421	Laparoscopic	Hysterectomy
400	13.5	40.9	489	10.9	33.2	396	Laparoscopic	Hysterectomy
403	12.9	39.3	435	11.8	35.3	390	Laparoscopic	Hysterectomy
428	13.8	41.8	515	12.1	36.9	457	Laparoscopic	Hysterectomy
444	12.3	39.8	460	9.2	29.6	339	Laparoscopic	Hysterectomy
451	11.5	36.1	485	9.5	29.4	393	Laparoscopic	Hysterectomy
460	12.5	36.1	417	11.3	33.7	385	Laparoscopic	Hysterectomy
501	12.2	36.3	391	10.2	30.8	329	Laparoscopic	Hysterectomy
502	11.7	36.2	392	8.7	26	280	Laparoscopic	Hysterectomy
545	11.7	34.2	385	10.8	32.6	359	Laparoscopic	Hysterectomy
559	13	40.2	423	12.2	38.5	409	Laparoscopic	Hysterectomy
575	10	30.8	340	7.2	22.3	245	Laparoscopic	Hysterectomy
590	12.3	36.6	390	9.3	28.3	296	Laparoscopic	Hysterectomy
702	13.1	39.6	449	10.5	31.9	351	Laparoscopic	Hysterectomy
752	10.5	32.1	390	8.6	27.6	318	Laparoscopic	Hysterectomy
800	13.4	40.7	438	9.3	28.5	304	Laparoscopic	Hysterectomy
802	11.9	37.3	437	9.4	29.7	350	Laparoscopic	Hysterectomy
860	11	35.1	447	7.6	24.4	304	Laparoscopic	Hysterectomy
968	13.1	38.1	434	10.7	31.1	359	Laparoscopic	Hysterectomy
0	12.9	38.3	422	11.5	34.7	379	Laparoscopic	Myomectomy
0	14.8	43.6	506	13.3	40	455	Laparoscopic	Myomectomy
0	12.5	35.8	418	10.3	30.5	345	Laparoscopic	Myomectomy
0	13.3	41.1	473	11.6	35.6	406	Laparoscopic	Myomectomy
0	13.2	38.7	462	12.7	37.6	440	Laparoscopic	Myomectomy
0	11.1	35.2	409	9.6	30.6	358	Laparoscopic	Myomectomy
0	12.5	37.6	418	11.9	35.2	391	Laparoscopic	Myomectomy
0	12.8	38.4	419	10.6	31.9	344	Laparoscopic	Myomectomy
0	13	38.4	431	12.3	35.7	403	Laparoscopic	Myomectomy
0	12.6	37.4	443	12.3	36.3	429	Laparoscopic	Myomectomy
0	13.4	38.1	453	10.1	29.8	351	Laparoscopic	Myomectomy
0	12.5	36.1	445	11.2	33.2	404	Laparoscopic	Myomectomy
0	13.1	37.2	413	10.9	31.8	355	Laparoscopic	Myomectomy
0	14.1	42.3	498	14.4	43.7	519	Laparoscopic	Myomectomy
0	12.7	38.5	420	11.2	34	375	Laparoscopic	Myomectomy
0	12.8	38.3	386	12.3	37.7	376	Laparoscopic	Myomectomy
1	12.9	38.8	431	11.4	35.1	388	Laparoscopic	Myomectomy
1	13.4	38.6	436	12.3	35.7	399	Laparoscopic	Myomectomy
2	13.6	40.1	435	13.1	38.8	424	Laparoscopic	Myomectomy
2	11.8	35.6	457	10.7	32.4	421	Laparoscopic	Myomectomy
2	13.5	40.2	468	13.8	40.8	467	Laparoscopic	Myomectomy
3	15.2	45.6	512	11.9	37.7	415	Laparoscopic	Myomectomy
3	12.2	37	476	11.3	34.4	436	Laparoscopic	Myomectomy
4	12.6	37.2	412	9.7	29.5	322	Laparoscopic	Myomectomy
4	13.4	40.8	473	11.8	36.1	417	Laparoscopic	Myomectomy
4	13.8	39.9	460	12.1	35.3	403	Laparoscopic	Myomectomy
5	12.6	36.4	399	11.3	33.1	362	Laparoscopic	Myomectomy
5	13	38.5	447	11.9	35.3	411	Laparoscopic	Myomectomy
5	9.6	31.1	419	8.8	28.4	379	Laparoscopic	Myomectomy
5	13.9	42.4	440	11.9	37	387	Laparoscopic	Myomectomy
5	13.5	40.3	446	12.6	37.7	418	Laparoscopic	Myomectomy
5	14.3	40.7	439	14.2	42.2	445	Laparoscopic	Myomectomy
5	13.3	38.9	436	12.2	36.1	403	Laparoscopic	Myomectomy
6	11.5	34.8	398	8.3	25.6	293	Laparoscopic	Myomectomy
6	13.2	39.3	466	11.8	36	424	Laparoscopic	Myomectomy
6	11.2	32.6	379	10	29.5	338	Laparoscopic	Myomectomy
7	13.6	40.7	451	12.1	37.1	401	Laparoscopic	Myomectomy
10	11.6	37	407	11.5	36.9	401	Laparoscopic	Myomectomy
10	10.5	33.5	408	10.2	32.9	398	Laparoscopic	Myomectomy
10	12.8	37	429	12.2	36	414	Laparoscopic	Myomectomy
10	12	36.8	426	10.7	33.2	381	Laparoscopic	Myomectomy
10	12.4	37.2	420	11.9	35.4	399	Laparoscopic	Myomectomy
10	13	38.3	457	11.2	33.8	397	Laparoscopic	Myomectomy
10	12.3	35.3	405	11.8	33.9	386	Laparoscopic	Myomectomy
10	13.8	40.5	430	12.7	37.3	398	Laparoscopic	Myomectomy
10	13.1	38	447	11.9	35.6	409	Laparoscopic	Myomectomy
10	13.1	39.9	431	11.2	33.4	368	Laparoscopic	Myomectomy
10	12	37.4	440	10.8	33.4	389	Laparoscopic	Myomectomy
11	13.5	39.8	447	12.2	37.7	410	Laparoscopic	Myomectomy
11	13.8	42.1	484	12.8	39.4	450	Laparoscopic	Myomectomy
12	13.4	40	438	12.2	37.4	405	Laparoscopic	Myomectomy
12	9.3	29	351	8.8	27.5	332	Laparoscopic	Myomectomy
13	13.1	37.7	437	12.1	35.5	405	Laparoscopic	Myomectomy
13	10	31.9	423	8.9	28.4	374	Laparoscopic	Myomectomy
14	11.7	36.8	453	11	34.7	429	Laparoscopic	Myomectomy
14	13.4	39.2	418	11.6	34.9	372	Laparoscopic	Myomectomy
15	13.9	40.8	477	12.7	37.7	434	Laparoscopic	Myomectomy
15	12.9	39.3	399	10.8	34	339	Laparoscopic	Myomectomy
15	13.6	40.9	471	10.4	31.2	354	Laparoscopic	Myomectomy
15	11.7	36.7	444	11.8	37.4	442	Laparoscopic	Myomectomy
16	14.8	44	517	12.7	38.9	446	Laparoscopic	Myomectomy
16	14.1	40.5	439	12.6	37.5	404	Laparoscopic	Myomectomy
16	12.5	37.8	423	11.6	35.6	398	Laparoscopic	Myomectomy
16	12.8	37.8	456	12.1	35.4	424	Laparoscopic	Myomectomy
19	14.1	40.2	450	13.1	38	424	Laparoscopic	Myomectomy
19	13.4	39.9	419	11.4	32.9	355	Laparoscopic	Myomectomy
20	12.4	36.7	411	11.5	35	387	Laparoscopic	Myomectomy
20	12.5	36.8	414	11.5	34	382	Laparoscopic	Myomectomy
20	13.6	40.4	440	12.5	37.7	406	Laparoscopic	Myomectomy
20	12.3	37	406	11.1	33.7	366	Laparoscopic	Myomectomy
20	12.7	38	419	11.6	35.4	384	Laparoscopic	Myomectomy
20	13.4	40.5	466	12.4	37.5	429	Laparoscopic	Myomectomy
20	13	37.9	415	11.4	33.8	371	Laparoscopic	Myomectomy
20	13	39.4	437	12.1	36.9	412	Laparoscopic	Myomectomy
20	13	40.1	446	12.4	38.3	427	Laparoscopic	Myomectomy
21	13.3	39.5	465	11.8	36.1	416	Laparoscopic	Myomectomy
21	15.3	45.4	526	14.5	43.1	495	Laparoscopic	Myomectomy
22	13.2	40.4	454	11.4	35.4	400	Laparoscopic	Myomectomy
22	13.6	39.5	402	11.8	34.3	349	Laparoscopic	Myomectomy
22	13.5	39.2	422	12.9	39.1	413	Laparoscopic	Myomectomy
23	14.7	42.1	454	12.1	36.4	383	Laparoscopic	Myomectomy
24	13.4	40.3	438	12.4	37.8	405	Laparoscopic	Myomectomy
24	14.9	45.1	520	12.2	38.2	438	Laparoscopic	Myomectomy
24	15	42.9	476	12.1	35.8	389	Laparoscopic	Myomectomy
24	12.8	38	420	12.4	37.5	409	Laparoscopic	Myomectomy
25	14.2	42.4	458	12.9	38.8	418	Laparoscopic	Myomectomy
25	13.1	38.6	459	11.8	35.7	418	Laparoscopic	Myomectomy
25	13.4	40.7	470	11.1	33.8	394	Laparoscopic	Myomectomy
25	13.8	39.1	455	12.1	36.1	412	Laparoscopic	Myomectomy
25	12	38.1	474	10.9	34.4	432	Laparoscopic	Myomectomy
26	13.2	39	424	11.2	34.2	369	Laparoscopic	Myomectomy
26	13.2	38.5	440	12.7	37.9	427	Laparoscopic	Myomectomy
26	12.7	37.6	416	10.6	31.8	349	Laparoscopic	Myomectomy
27	12.1	36.7	429	10.3	31.9	368	Laparoscopic	Myomectomy
27	13.6	39.2	481	12.4	36.6	445	Laparoscopic	Myomectomy
28	12.6	37.5	425	11.6	34.8	393	Laparoscopic	Myomectomy
28	13.9	41.2	483	11.9	35.4	416	Laparoscopic	Myomectomy
28	13.9	42.6	479	12.7	38.6	431	Laparoscopic	Myomectomy
29	13.4	39.1	454	11.9	35.2	401	Laparoscopic	Myomectomy
30	13.5	40.5	466	13	38.9	447	Laparoscopic	Myomectomy
30	13.5	39.6	411	12	35.7	365	Laparoscopic	Myomectomy
30	13.3	40.5	452	10.9	32.5	365	Laparoscopic	Myomectomy
30	14.6	43.5	466	10.4	31	327	Laparoscopic	Myomectomy
30	12.3	37.9	394	10.5	32.7	336	Laparoscopic	Myomectomy
30	14.9	43.6	467	13.3	39.5	413	Laparoscopic	Myomectomy
30	13.1	39.5	436	11.6	34.9	392	Laparoscopic	Myomectomy
31	13	38.3	410	11.8	35.7	382	Laparoscopic	Myomectomy
31	13.4	39.7	441	11.8	35.6	386	Laparoscopic	Myomectomy
31	13.8	43.5	490	12.9	40.3	449	Laparoscopic	Myomectomy
32	13.4	40	464	11.8	35.8	403	Laparoscopic	Myomectomy
32	14.5	41.9	485	12.5	36.5	426	Laparoscopic	Myomectomy
32	12.8	38	400	10.7	32.3	343	Laparoscopic	Myomectomy
33	12.2	37.1	407	10.6	31.9	351	Laparoscopic	Myomectomy
34	11.6	33.8	375	10.4	30.1	329	Laparoscopic	Myomectomy
35	11.9	36.5	445	12	36.7	454	Laparoscopic	Myomectomy
36	14.7	43.7	495	11.4	34.5	385	Laparoscopic	Myomectomy
38	13.4	39.6	443	12.8	38.4	429	Laparoscopic	Myomectomy
38	13.7	40.6	432	12.3	36.5	386	Laparoscopic	Myomectomy
39	14.7	44.1	485	13.1	40.1	436	Laparoscopic	Myomectomy
40	12.1	36.8	411	10.2	32.1	353	Laparoscopic	Myomectomy
40	11.8	37	472	10.3	33.1	417	Laparoscopic	Myomectomy
42	13	39.3	418	11.2	33.8	360	Laparoscopic	Myomectomy
42	12.7	39.5	479	11.8	37.3	447	Laparoscopic	Myomectomy
43	12.3	35.9	389	10.1	29.4	323	Laparoscopic	Myomectomy
45	13.5	39.7	445	12.8	38.7	424	Laparoscopic	Myomectomy
50	11.6	36.5	488	10.6	33.7	438	Laparoscopic	Myomectomy
50	13.8	39.7	481	11.5	34.4	410	Laparoscopic	Myomectomy
50	13.6	39	453	13	37.2	430	Laparoscopic	Myomectomy
50	14.6	42.3	490	12.9	37	435	Laparoscopic	Myomectomy
50	14	41	452	13	39.1	431	Laparoscopic	Myomectomy
50	12.9	39.7	462	13	39.7	466	Laparoscopic	Myomectomy
50	13.3	39	438	13.5	39.9	450	Laparoscopic	Myomectomy
51	12.8	38.8	434	10.8	32.8	362	Laparoscopic	Myomectomy
51	12.7	39.4	443	11	34.3	384	Laparoscopic	Myomectomy
52	13.2	39.3	434	10.9	32.6	359	Laparoscopic	Myomectomy
52	13.3	39.7	459	11.6	35.2	399	Laparoscopic	Myomectomy
52	13.6	40.2	490	12.7	38.1	460	Laparoscopic	Myomectomy
52	12.2	37	402	8.1	24.5	270	Laparoscopic	Myomectomy
53	13.3	40.3	460	11.9	37	413	Laparoscopic	Myomectomy
53	15.1	43.5	467	13.3	39.9	415	Laparoscopic	Myomectomy
53	13.9	39.6	410	14.2	41.5	418	Laparoscopic	Myomectomy
53	14	42.3	497	12.2	37.4	437	Laparoscopic	Myomectomy
53	12.3	37.9	484	10.5	33.7	413	Laparoscopic	Myomectomy
54	11.7	35.8	430	12.8	39.5	470	Laparoscopic	Myomectomy
55	12.7	37.9	455	12.2	36.9	432	Laparoscopic	Myomectomy
55	11.2	33.5	405	10.4	31.3	374	Laparoscopic	Myomectomy
55	13	38.4	414	11.4	35	369	Laparoscopic	Myomectomy
55	15.4	43.5	466	13.4	38.8	410	Laparoscopic	Myomectomy
55	12.7	38.2	440	10.9	33	377	Laparoscopic	Myomectomy
55	12.1	36.1	416	11.6	34.5	401	Laparoscopic	Myomectomy
58	14.7	43.4	497	11.7	35.5	401	Laparoscopic	Myomectomy
58	12.6	36.9	395	12	35.9	382	Laparoscopic	Myomectomy
60	14	41.1	448	12	36	386	Laparoscopic	Myomectomy
60	13.5	40.8	492	10.8	33.3	394	Laparoscopic	Myomectomy
60	12.1	36	418	11	33.8	387	Laparoscopic	Myomectomy
60	12.7	37.9	463	11.5	35	425	Laparoscopic	Myomectomy
60	12.9	38.5	449	12	36.5	422	Laparoscopic	Myomectomy
61	13.5	40	480	12.2	37	438	Laparoscopic	Myomectomy
62	12.3	36.5	439	10.8	33.1	392	Laparoscopic	Myomectomy
63	12.6	37.8	419	11.1	32.6	361	Laparoscopic	Myomectomy
63	11.6	35.9	393	10.2	32.1	348	Laparoscopic	Myomectomy
64	13.2	39.6	443	11.8	36.1	400	Laparoscopic	Myomectomy
64	14.5	42.3	458	12.7	37.9	407	Laparoscopic	Myomectomy
64	13.1	39.2	448	11.8	36.2	406	Laparoscopic	Myomectomy
64	12.5	37.1	406	9.9	29.9	319	Laparoscopic	Myomectomy
65	10	31	345	9.6	29.5	328	Laparoscopic	Myomectomy
65	12.9	37.6	426	11	32.5	370	Laparoscopic	Myomectomy
67	14.2	42	515	12.6	38.2	460	Laparoscopic	Myomectomy
67	12.3	37.9	415	11.3	33.7	382	Laparoscopic	Myomectomy
69	14.1	39.9	454	12.7	37.2	411	Laparoscopic	Myomectomy
69	13.7	41.2	475	12.7	39.2	445	Laparoscopic	Myomectomy
70	12.9	38.2	408	11.4	34.1	360	Laparoscopic	Myomectomy
70	12.9	38.5	448	11.7	34.5	401	Laparoscopic	Myomectomy
73	14.6	42.9	478	12.1	35.4	395	Laparoscopic	Myomectomy
76	12.1	37.5	418	11.3	34.7	388	Laparoscopic	Myomectomy
77	13.7	39.2	495	11.9	35.4	438	Laparoscopic	Myomectomy
77	13	39.6	420	11.5	35.5	371	Laparoscopic	Myomectomy
77	13.7	42.3	447	10.6	32.6	339	Laparoscopic	Myomectomy
79	13.8	41.5	461	12.3	38.1	420	Laparoscopic	Myomectomy
81	13.3	40	454	11.7	34.2	390	Laparoscopic	Myomectomy
82	13	40.8	534	11.9	38.1	493	Laparoscopic	Myomectomy
82	12	35.7	372	10	29.9	309	Laparoscopic	Myomectomy
83	12.3	35.7	382	10.9	33.2	348	Laparoscopic	Myomectomy
84	13.6	40.4	445	14.3	42.7	466	Laparoscopic	Myomectomy
84	13.5	41.8	485	11.9	36.9	424	Laparoscopic	Myomectomy
84	14.4	42.6	509	12.7	38.5	452	Laparoscopic	Myomectomy
84	12.5	37.8	423	10	29.9	334	Laparoscopic	Myomectomy
85	13.4	40.1	450	12.4	36.6	418	Laparoscopic	Myomectomy
85	12.3	37.2	420	10.9	32.9	365	Laparoscopic	Myomectomy
89	13.9	40.2	470	11.4	34	390	Laparoscopic	Myomectomy
90	14.3	42.4	494	12.5	38.3	442	Laparoscopic	Myomectomy
90	13.9	40.8	440	12	35.5	377	Laparoscopic	Myomectomy
90	13.7	40	439	12.9	37.8	414	Laparoscopic	Myomectomy
91	14.1	41.2	466	12.4	36.9	415	Laparoscopic	Myomectomy
93	12.9	39.3	442	11.7	36.3	409	Laparoscopic	Myomectomy
95	12.4	36.1	391	11.4	33.2	355	Laparoscopic	Myomectomy
96	13.8	41.1	453	11.3	33.8	374	Laparoscopic	Myomectomy
98	12.6	39.4	467	12	35.8	424	Laparoscopic	Myomectomy
98	12.4	38.7	450	11.6	36.3	418	Laparoscopic	Myomectomy
99	13.2	38.6	438	10.6	32	355	Laparoscopic	Myomectomy
99	11.3	34.8	432	10.9	34.1	415	Laparoscopic	Myomectomy
100	13.1	39.1	446	13	39.2	440	Laparoscopic	Myomectomy
100	13.6	39.9	477	11.8	35.4	411	Laparoscopic	Myomectomy
100	12.3	37.5	438	10.8	33.3	390	Laparoscopic	Myomectomy
100	12.3	38.3	399	10	31	319	Laparoscopic	Myomectomy
100	12.7	38.1	458	12	35.8	427	Laparoscopic	Myomectomy
100	12.9	38.9	417	11.9	36.3	385	Laparoscopic	Myomectomy
100	12.6	37.2	436	11.8	35.2	411	Laparoscopic	Myomectomy
100	15.6	44.1	492	11.8	33.8	380	Laparoscopic	Myomectomy
100	12.9	38.7	384	11.9	35.5	353	Laparoscopic	Myomectomy
100	12.5	39.9	552	11.4	38.1	527	Laparoscopic	Myomectomy
100	12.4	36.6	393	11.1	32.2	350	Laparoscopic	Myomectomy
100	12.9	37.4	420	12.2	35.4	390	Laparoscopic	Myomectomy
100	13.6	40.3	490	12.3	36.9	443	Laparoscopic	Myomectomy
100	12.4	39.1	448	11.5	35.5	407	Laparoscopic	Myomectomy
101	15.6	44.4	491	12.7	36.4	401	Laparoscopic	Myomectomy
101	12.8	39.9	471	12.4	38.4	461	Laparoscopic	Myomectomy
101	10.4	34.7	461	9.5	31.2	415	Laparoscopic	Myomectomy
101	11.6	35.4	396	9.9	30.8	342	Laparoscopic	Myomectomy
102	14.1	42.3	499	12.5	38.2	443	Laparoscopic	Myomectomy
102	15.2	43.6	491	14	41.9	467	Laparoscopic	Myomectomy
102	14.4	41	486	12.7	36.9	434	Laparoscopic	Myomectomy
102	13.3	39.6	505	12	37.3	459	Laparoscopic	Myomectomy
102	14.5	41.5	458	13.5	39	431	Laparoscopic	Myomectomy
102	14.5	44.1	485	13.2	40.7	441	Laparoscopic	Myomectomy
103	12.8	38.4	457	11.3	34.9	413	Laparoscopic	Myomectomy
103	12.6	38.3	417	11.3	35.2	372	Laparoscopic	Myomectomy
104	13.2	38.7	438	13.2	38.8	443	Laparoscopic	Myomectomy
104	13.6	41.6	436	12.5	37	396	Laparoscopic	Myomectomy
105	13.5	39.5	454	12.2	36	420	Laparoscopic	Myomectomy
105	13.7	39.6	435	11.5	34.1	370	Laparoscopic	Myomectomy
108	12.4	36.6	413	9.5	27.5	315	Laparoscopic	Myomectomy
110	13.6	40.2	438	11.5	34	369	Laparoscopic	Myomectomy
110	12.9	39.4	412	11.1	34.5	356	Laparoscopic	Myomectomy
112	12.8	38.2	438	11	32.8	376	Laparoscopic	Myomectomy
117	14.3	44.1	487	12.9	39.3	431	Laparoscopic	Myomectomy
117	12.8	38	434	10.5	31.9	367	Laparoscopic	Myomectomy
118	14.1	42.3	475	13.5	40.4	453	Laparoscopic	Myomectomy
118	12.4	38.1	437	10	31.1	353	Laparoscopic	Myomectomy
119	13.3	38.1	426	12.3	36	401	Laparoscopic	Myomectomy
120	12.2	36.9	382	10.5	31.7	324	Laparoscopic	Myomectomy
120	12.4	36.9	432	10.7	32.5	376	Laparoscopic	Myomectomy
121	12	35.9	377	11	33.7	347	Laparoscopic	Myomectomy
122	12.1	35.4	387	10.8	31.5	338	Laparoscopic	Myomectomy
123	12.9	37.8	392	10.9	32	336	Laparoscopic	Myomectomy
123	13	40.3	479	11.2	35.7	416	Laparoscopic	Myomectomy
125	14.5	43.4	518	12	36.7	440	Laparoscopic	Myomectomy
127	12.8	37.2	397	12.5	36.9	389	Laparoscopic	Myomectomy
128	11.7	35.1	410	10.1	30.8	356	Laparoscopic	Myomectomy
129	13.1	39.5	452	10.3	31.2	353	Laparoscopic	Myomectomy
129	13	38.1	420	11.7	35.3	377	Laparoscopic	Myomectomy
130	11.5	34.4	348	8.8	27.6	270	Laparoscopic	Myomectomy
130	16.3	46.2	518	13.5	39.4	429	Laparoscopic	Myomectomy
132	12.3	38.1	458	10.6	32.2	376	Laparoscopic	Myomectomy
132	13.5	39.1	442	10.2	30.5	337	Laparoscopic	Myomectomy
133	12.1	35.8	405	9.8	28.9	331	Laparoscopic	Myomectomy
133	13.3	41.3	470	12.6	38	438	Laparoscopic	Myomectomy
134	13	39.2	440	10.7	32.1	360	Laparoscopic	Myomectomy
136	13.7	40.5	484	12.3	37.3	448	Laparoscopic	Myomectomy
140	12	34.8	419	10.3	29.7	359	Laparoscopic	Myomectomy
140	8.4	25.6	281	6.4	20.1	214	Laparoscopic	Myomectomy
141	12.9	38.4	453	11.5	34.3	403	Laparoscopic	Myomectomy
145	12.1	36.1	408	10.7	32.2	358	Laparoscopic	Myomectomy
150	12.2	37.7	499	11.1	33.9	451	Laparoscopic	Myomectomy
150	13.4	39.1	398	12.5	37	375	Laparoscopic	Myomectomy
150	12.9	39.1	411	9.2	28.2	287	Laparoscopic	Myomectomy
150	10.6	34	403	9.1	29.6	345	Laparoscopic	Myomectomy
150	13.1	39.2	434	11.3	34.2	373	Laparoscopic	Myomectomy
150	14.2	41.4	465	11.8	34.7	392	Laparoscopic	Myomectomy
150	14	40.7	452	11.3	33.7	363	Laparoscopic	Myomectomy
150	13.4	40.7	475	11	33.7	388	Laparoscopic	Myomectomy
151	12.7	39.3	446	11.1	35.4	396	Laparoscopic	Myomectomy
153	12.1	37.2	422	9.8	30.1	339	Laparoscopic	Myomectomy
153	10.7	34.2	403	9.2	29.4	347	Laparoscopic	Myomectomy
153	11.9	36.3	431	12.1	37.4	444	Laparoscopic	Myomectomy
154	13.2	39.1	404	11.9	35.8	365	Laparoscopic	Myomectomy
155	14.2	43.2	510	12.5	38.3	455	Laparoscopic	Myomectomy
156	11.8	36.4	476	11	34.7	445	Laparoscopic	Myomectomy
158	12.4	37.5	412	10	29.4	333	Laparoscopic	Myomectomy
159	13.7	42.2	511	11.1	34.5	413	Laparoscopic	Myomectomy
162	11.1	35.4	445	9.7	30.7	390	Laparoscopic	Myomectomy
162	13.3	39.8	446	11	33.5	368	Laparoscopic	Myomectomy
163	14.5	43	482	13.5	40.7	446	Laparoscopic	Myomectomy
170	13.6	40	451	12.4	36.8	409	Laparoscopic	Myomectomy
170	12.7	39.3	423	11	34.3	367	Laparoscopic	Myomectomy
170	12.9	39.4	460	9.7	29.6	338	Laparoscopic	Myomectomy
177	13.1	37.2	398	11.1	33	340	Laparoscopic	Myomectomy
178	15.3	45.3	505	14.9	44.8	499	Laparoscopic	Myomectomy
183	12.5	37.8	424	9.8	29.7	325	Laparoscopic	Myomectomy
184	13.7	41.1	467	9.8	29.8	332	Laparoscopic	Myomectomy
185	12.8	36.8	379	10.3	30.4	308	Laparoscopic	Myomectomy
188	10.6	32.1	346	8.9	27.3	289	Laparoscopic	Myomectomy
189	12.6	38	440	9.3	28.3	325	Laparoscopic	Myomectomy
190	10.9	32.9	359	9.2	28.5	302	Laparoscopic	Myomectomy
190	13	39.6	490	10.9	33.4	414	Laparoscopic	Myomectomy
193	13.7	39.7	459	10.5	30.4	346	Laparoscopic	Myomectomy
194	13.8	40.3	451	11.1	32.9	368	Laparoscopic	Myomectomy
197	11.7	35.2	412	9.6	29.4	335	Laparoscopic	Myomectomy
197	12.5	38.3	464	11.2	34.1	417	Laparoscopic	Myomectomy
200	12.6	38.4	420	9.9	30.8	333	Laparoscopic	Myomectomy
200	11.9	36.7	421	9.7	30.5	349	Laparoscopic	Myomectomy
200	14.8	43.8	511	13.7	40.5	469	Laparoscopic	Myomectomy
200	14.5	42.1	485	13	38.3	439	Laparoscopic	Myomectomy
200	12.6	37.4	403	11.2	33.8	362	Laparoscopic	Myomectomy
200	12.4	38.3	519	8.3	25.4	340	Laparoscopic	Myomectomy
200	14.7	42.5	484	9.1	26.7	302	Laparoscopic	Myomectomy
200	12.8	38.4	414	11.6	34.6	368	Laparoscopic	Myomectomy
200	12.5	38.5	429	10.7	32.4	358	Laparoscopic	Myomectomy
200	12	35.6	415	10.7	32	375	Laparoscopic	Myomectomy
200	13.8	40.3	445	11.9	35.2	386	Laparoscopic	Myomectomy
200	13.6	41.3	485	11.6	35.7	419	Laparoscopic	Myomectomy
200	12.9	39	465	11.9	35.3	422	Laparoscopic	Myomectomy
200	13.4	40.2	445	10.3	31.7	349	Laparoscopic	Myomectomy
200	11	34.5	374	11	33.9	375	Laparoscopic	Myomectomy
202	13.2	38.6	427	11.9	35.5	383	Laparoscopic	Myomectomy
202	13.4	41.8	554	11	35.4	455	Laparoscopic	Myomectomy
202	12.4	38.7	445	10.6	33.1	385	Laparoscopic	Myomectomy
203	11.6	34.8	382	10.8	32.7	359	Laparoscopic	Myomectomy
203	13	38.3	407	11.1	33.7	350	Laparoscopic	Myomectomy
203	14	40.4	456	12.7	38.4	413	Laparoscopic	Myomectomy
204	10.3	33.3	417	9.9	31.6	398	Laparoscopic	Myomectomy
205	13.4	41.2	503	12.8	39.7	475	Laparoscopic	Myomectomy
205	13.7	39.4	449	11.3	33.4	379	Laparoscopic	Myomectomy
206	11.9	35.9	413	10.4	30.6	354	Laparoscopic	Myomectomy
207	13.1	36.6	442	12.5	37.4	432	Laparoscopic	Myomectomy
210	13.8	39.8	466	12.3	36.5	415	Laparoscopic	Myomectomy
214	14	40.6	466	12	35.9	407	Laparoscopic	Myomectomy
219	12.9	39.5	507	11.2	35	440	Laparoscopic	Myomectomy
219	13.3	38.8	430	11.7	34.8	376	Laparoscopic	Myomectomy
220	13.8	40.9	485	11.2	33.5	389	Laparoscopic	Myomectomy
226	11.7	35.3	386	9.4	28.5	312	Laparoscopic	Myomectomy
233	14	38.6	464	11.5	33	388	Laparoscopic	Myomectomy
235	11.7	34.3	401	9.5	28.2	321	Laparoscopic	Myomectomy
240	11.4	34	375	11.9	35.3	387	Laparoscopic	Myomectomy
246	11.8	35.8	444	10.8	33.1	409	Laparoscopic	Myomectomy
250	14.5	43.6	463	12.5	38	402	Laparoscopic	Myomectomy
250	12.6	37.7	410	11.6	34.9	375	Laparoscopic	Myomectomy
250	12	36.8	439	11.2	34.3	413	Laparoscopic	Myomectomy
250	14	41.8	508	12.6	38.1	458	Laparoscopic	Myomectomy
250	12.2	37.1	464	11.3	34.5	421	Laparoscopic	Myomectomy
252	13.8	41.3	456	12.3	37.5	405	Laparoscopic	Myomectomy
254	14.3	40	475	12.4	35.7	425	Laparoscopic	Myomectomy
255	11.2	35.3	408	10.7	33.4	383	Laparoscopic	Myomectomy
255	12.2	36.3	402	10	29.8	328	Laparoscopic	Myomectomy
255	12.9	38.8	417	12.7	36.9	400	Laparoscopic	Myomectomy
260	11	34.9	426	8.5	27.3	329	Laparoscopic	Myomectomy
260	12.4	36.3	418	9.9	28.6	331	Laparoscopic	Myomectomy
272	11.8	36.7	407	10.7	33.5	376	Laparoscopic	Myomectomy
275	13.8	41	448	9.2	27	297	Laparoscopic	Myomectomy
279	11.7	34	364	11.6	34.4	371	Laparoscopic	Myomectomy
280	13.3	39.2	449	10.4	31.3	355	Laparoscopic	Myomectomy
284	12.1	36.3	401	9.6	28.7	316	Laparoscopic	Myomectomy
285	13.3	38.9	411	11.2	34	352	Laparoscopic	Myomectomy
289	13.4	40.6	430	12.1	36.2	381	Laparoscopic	Myomectomy
300	13.4	38.9	431	10.8	32.5	354	Laparoscopic	Myomectomy
300	13	39.1	417	11.1	33.7	357	Laparoscopic	Myomectomy
301	13.2	38.2	437	10.6	31.1	354	Laparoscopic	Myomectomy
301	13.8	40.7	463	11.4	33.6	380	Laparoscopic	Myomectomy
301	12.5	38.3	440	9.8	31	348	Laparoscopic	Myomectomy
301	11.6	35	406	10.7	32.4	374	Laparoscopic	Myomectomy
302	11.8	37.1	467	10.3	33.3	415	Laparoscopic	Myomectomy
302	13.3	39.7	429	9.9	29.3	318	Laparoscopic	Myomectomy
303	12.4	36.9	406	11	32.7	360	Laparoscopic	Myomectomy
303	12.6	38.7	445	9.6	29.3	332	Laparoscopic	Myomectomy
304	12.3	38.7	495	9.7	31.4	392	Laparoscopic	Myomectomy
305	13.5	40.9	514	12	37.5	463	Laparoscopic	Myomectomy
305	11.7	35.4	398	9.9	30.5	344	Laparoscopic	Myomectomy
310	12.2	37.5	473	10.5	33.2	410	Laparoscopic	Myomectomy
312	12.8	38.2	429	12	36.4	399	Laparoscopic	Myomectomy
321	13.8	40.6	461	12.6	37.5	422	Laparoscopic	Myomectomy
321	12.9	38.4	449	12.2	36.5	435	Laparoscopic	Myomectomy
323	13.6	38.8	432	11.5	34	373	Laparoscopic	Myomectomy
330	11.1	35	452	10.1	31.8	408	Laparoscopic	Myomectomy
330	14.5	41.8	480	11.2	32.5	374	Laparoscopic	Myomectomy
333	12.3	38.4	405	8.8	27.7	289	Laparoscopic	Myomectomy
346	12.1	35.8	403	8.9	26.1	294	Laparoscopic	Myomectomy
347	10.6	35	493	10.4	33.8	474	Laparoscopic	Myomectomy
347	14.2	42.9	482	11.9	36.5	407	Laparoscopic	Myomectomy
350	13.8	40	449	12.6	36.8	401	Laparoscopic	Myomectomy
351	11.9	35.6	410	10.2	31.4	356	Laparoscopic	Myomectomy
352	12	36.1	379	9.2	27.8	291	Laparoscopic	Myomectomy
360	13	39	446	10.3	31.5	361	Laparoscopic	Myomectomy
386	12.2	39.2	501	10.2	33.1	417	Laparoscopic	Myomectomy
400	12.5	37.4	405	9.5	28.8	310	Laparoscopic	Myomectomy
400	13.2	38.8	434	10.4	31.8	348	Laparoscopic	Myomectomy
400	13.5	40.1	461	12.1	36.5	415	Laparoscopic	Myomectomy
400	11.7	33.8	390	9.5	29.1	333	Laparoscopic	Myomectomy
400	11.2	33.4	376	9.6	28.9	321	Laparoscopic	Myomectomy
400	14	43	518	10.6	33	394	Laparoscopic	Myomectomy
405	13.3	40.9	479	9.8	30.2	348	Laparoscopic	Myomectomy
406	16.1	46.9	556	12.6	37.5	433	Laparoscopic	Myomectomy
409	11.1	35.7	437	10.1	32.6	403	Laparoscopic	Myomectomy
412	13.2	39.7	441	11.6	36.1	394	Laparoscopic	Myomectomy
423	11	33.7	388	7.9	24.4	281	Laparoscopic	Myomectomy
424	13.5	39.3	428	9.1	27	291	Laparoscopic	Myomectomy
438	12.3	36.9	466	9.5	28.4	352	Laparoscopic	Myomectomy
440	10.9	34.2	391	8.2	26.4	294	Laparoscopic	Myomectomy
442	11.5	36.3	450	8.9	28.1	347	Laparoscopic	Myomectomy
445	13.9	40.6	458	8.8	25.4	292	Laparoscopic	Myomectomy
462	12.9	38.7	439	11.7	36.3	408	Laparoscopic	Myomectomy
467	13.7	40.8	472	9.8	29.6	340	Laparoscopic	Myomectomy
475	9.9	30.1	353	7.4	23	265	Laparoscopic	Myomectomy
492	12.8	39.1	432	9	28.2	305	Laparoscopic	Myomectomy
500	10	32.5	446	7.3	23.8	322	Laparoscopic	Myomectomy
500	12.5	37.6	439	10.5	31.9	370	Laparoscopic	Myomectomy
500	12.7	38	433	11.2	33.5	385	Laparoscopic	Myomectomy
500	13.5	41.3	432	9.7	29.9	310	Laparoscopic	Myomectomy
510	11.1	35.4	439	10	32.3	396	Laparoscopic	Myomectomy
551	12.9	39.6	450	9.7	29.9	334	Laparoscopic	Myomectomy
556	13	39.3	426	11.1	33.5	364	Laparoscopic	Myomectomy
581	11.1	33	372	8.4	25	281	Laparoscopic	Myomectomy
595	13.5	41	450	10	30.2	334	Laparoscopic	Myomectomy
595	12.9	38.2	463	11.3	32.8	409	Laparoscopic	Myomectomy
600	12.8	38.1	420	10.8	32.5	348	Laparoscopic	Myomectomy
600	12.3	37.8	469	10.3	32	399	Laparoscopic	Myomectomy
601	11.4	35.6	392	9.6	29.8	325	Laparoscopic	Myomectomy
602	13.6	41.2	455	11.5	35.9	391	Laparoscopic	Myomectomy
604	12.8	40.4	490	10.1	31.7	383	Laparoscopic	Myomectomy
611	11	34.2	424	7.8	24.7	299	Laparoscopic	Myomectomy
650	12.3	37.1	432	10.4	30.9	363	Laparoscopic	Myomectomy
692	12.6	39.4	463	10.8	34	393	Laparoscopic	Myomectomy
700	12.6	38.3	438	9.6	28.6	325	Laparoscopic	Myomectomy
701	12.9	37.6	397	11.1	32.9	343	Laparoscopic	Myomectomy
702	13.5	40.3	451	11.6	34	386	Laparoscopic	Myomectomy
715	13.4	40.2	442	9.6	29.6	325	Laparoscopic	Myomectomy
723	10.3	33.5	402	8	25.6	310	Laparoscopic	Myomectomy
730	12.3	35.5	410	10.3	29.9	345	Laparoscopic	Myomectomy
735	13.3	38.4	427	10.9	32	351	Laparoscopic	Myomectomy
750	13	38.8	452	10.5	31.9	364	Laparoscopic	Myomectomy
803	11.1	33.2	370	7.9	23.6	260	Laparoscopic	Myomectomy
805	11.3	35.8	388	7.3	23.3	254	Laparoscopic	Myomectomy
819	13.9	41.7	461	9.2	27.4	299	Laparoscopic	Myomectomy
825	13.6	42.3	528	8.4	26	325	Laparoscopic	Myomectomy
833	12.7	37.4	409	9.3	27	291	Laparoscopic	Myomectomy
850	13.6	40.6	464	10.3	32.3	360	Laparoscopic	Myomectomy
855	13.4	42.6	524	9	28	349	Laparoscopic	Myomectomy
960	14.8	43.8	500	9.4	27.4	310	Laparoscopic	Myomectomy
